# **Title:** Evolution of Carbon Isotope Fractionation in Cyanobacteria

**Authors:** Renée Z. Wang<sup>\*1</sup>, Robert J. Nichols<sup>2</sup>, Albert K. Liu<sup>3,4</sup>, Avi I. Flamholz<sup>5</sup>, Doug M. Banda<sup>6</sup>, David F. Savage<sup>2,7</sup>, John M. Eiler<sup>1</sup>, Patrick M. Shih<sup>3,8</sup>, Woodward W. Fischer<sup>1</sup>

**Author affiliations:** (1) California Institute of Technology, Division of Geological & Planetary Sciences. (2) University of California, Berkeley, Department of Molecular and Cell Biology. (3) Lawrence Berkeley National Lab, Joint Bioenergy Institute. (4) University of California, Davis, Biochemistry, Molecular, Cellular and Developmental Biology Graduate Group. (5) California Institute of Technology, Division of Biology and Biological Engineering. (6) University of California, Davis, Department of Plant Biology. (7) Howard Hughes Medical Institute, University of California, Berkeley, California 94720. (8) University of California, Berkeley, Department of Plant and Microbial Biology.

**Corresponding author:** \*Renée Z. Wang

**Email:** [rwang@caltech.edu](mailto:rwang@caltech.edu)

## **ORCID:**

R.Z.W.: 0000-0003-3994-3244

R.J.N.: 0000-0002-8476-0554

A.K.L.: 0000-0001-9500-0449

A.I.F.: 0000-0002-9278-5479

D.F.S.: 0000-0003-0042-2257

**Competing Interest Statement:** Authors have no competing interests.

**Classification:** Major: Physical Sciences. Minor: Earth, Atmospheric, and Planetary Sciences.

**Keywords:** Evolution, Carbon Isotopes, Rubisco, Cyanobacteria, Precambrian

## **Abstract**

The history of Earth's carbon cycle reflects trends in atmospheric composition convolved with the evolution of photosynthesis. Fortunately, key parts of the carbon cycle have been recorded in the carbon isotope ratios of sedimentary rocks. The dominant model used to interpret this record as a proxy for ancient atmospheric CO<sub>2</sub> is based on carbon isotope fractionations of modern photoautotrophs, and longstanding questions remain about how their evolution might have impacted the record. We interrogated the intersection of environment and evolution by measuring both biomass ( $\epsilon_p$ ) and enzymatic ( $\epsilon_{\text{Rubisco}}$ ) carbon isotope fractionations of a cyanobacterial strain (*Synechococcus elongatus* PCC 7942) solely expressing a putative ancestral Form 1B rubisco dating to >>1 Ga. This strain, nicknamed ANC, grows in ambient pCO<sub>2</sub> and

displays larger  $\epsilon_p$  values than WT, despite having a much smaller  $\epsilon_{\text{Rubisco}}$  ( $17.23 \pm 0.61\text{‰}$  vs.  $25.18 \pm 0.31\text{‰}$ , respectively). Measuring both enzymatic and biomass fractionation revealed a surprising result—ANC  $\epsilon_p$  exceeded ANC  $\epsilon_{\text{Rubisco}}$  in all conditions tested, violating prevailing models of cyanobacterial carbon isotope fractionation. However, these models were corrected by accounting for cyanobacterial physiology, notably the CO<sub>2</sub> concentrating mechanism (CCM). Our modified model indicated that powered inorganic carbon uptake systems contribute to  $\epsilon_p$ , and this effect is exacerbated in ANC. These data suggested that understanding the evolution of both the CCM and rubisco is critical for interpreting the carbon isotope record, and that large fluctuations in the record may reflect the evolving efficiency of carbon fixing metabolisms as well as changes in atmospheric CO<sub>2</sub>.

## Significance Statement

Fossils record the past, but so too do modern organisms via comparative biology. Rubisco is the most abundant protein on the planet, and is a keystone enzyme in photosynthesis. To understand how this process has co-evolved with changes in the abundance of atmospheric carbon dioxide, we reconstructed an ancestral rubisco (>one billion years old), and generated a mutant Cyanobacteria strain that must rely on this ancient protein for growth. By measuring the carbon isotope fractionation *in vitro* and *in vivo* we found that prevailing models of carbon flow in Cyanobacteria could be corrected by accounting for known aspects of cyanobacterial physiology. This highlighted the value of considering both evolution and physiology for comparative biological approaches to understanding Earth history.

## Main Text

### Introduction

Throughout Earth's history, autotrophic cells have had to take external, oxidized inorganic carbon (C<sub>i</sub>) and 'fix' it into reduced organic carbon (C<sub>o</sub>) to create biomass and grow. The challenge is particularly acute for aquatic autotrophs because the diffusion constant of CO<sub>2</sub> in air is ~10,000-fold greater than it is in water. In addition, in waters at pH 7-8, HCO<sub>3</sub><sup>-</sup> is 10-100 times more abundant than CO<sub>2</sub> but HCO<sub>3</sub><sup>-</sup> is much less membrane permeable (1). Therefore, the chemistry of C<sub>i</sub> imposes inherent constraints that carbon-fixing organisms must work within.

Today, and for much of Earth's history, the most widespread strategy for carbon fixation is the Calvin-Benson-Bassham (CBB) Cycle, where the key carbon fixation step is catalyzed by ribulose-1,5-bisphosphate (RuBP) carboxylase/oxygenase (rubisco) (2, 3). But rubisco's central role in the CBB cycle and oxygenic photosynthesis poses a conundrum because it is usually considered to be a non-specific and slow enzyme. The first issue concerns rubisco's dual carboxylase and oxygenase activities: the RuBP intermediate (enediolate) is susceptible to both O<sub>2</sub> and CO<sub>2</sub> attack (4). Consequently, instead of fixing a CO<sub>2</sub> molecule during photosynthesis, rubisco can instead assimilate O<sub>2</sub> to yield 2-phosphoglycolate (2-PG), which is not part of the

CBB cycle and therefore must be salvaged through photorespiratory pathways that consume ATP, reducing power, and carbon (5). The second issue concerns rubisco's maximum carboxylation rate ( $k_{cat}$ ), which is  $\approx 7$ -10 times slower than other central metabolic enzymes (6), and displays very limited variation across large phylogenetic distances (7).

Both issues—its dual carboxylase / oxygenase activity and limited maximum carboxylation rate—are typically rationalized by considering the evolutionary history of this enzyme in the context of long-term changes in environmental  $\text{CO}_2$  and  $\text{O}_2$  concentrations. Rubisco is thought to have evolved at a time when there was trace  $\text{O}_2$  and much higher  $\text{CO}_2$  concentrations in the atmosphere, in contrast to the modern atmosphere where  $\text{O}_2$  is roughly 20% while  $\text{CO}_2$  is only about 0.04% by partial pressure. Rubisco is also thought to have been the primary carboxylating enzyme of global photosynthesis since the Great Oxygenation Event, and potentially far prior (8).

Likely in response to these changing environmental concentrations, many aquatic photoautotrophs have evolved  $\text{CO}_2$  concentrating mechanisms (CCMs) that concentrate  $\text{CO}_2$  around rubisco in order to enhance carboxylation and suppress oxygenation. Currently, all known Cyanobacteria have CCMs, as do many bacterial chemolithoautotrophs, many aquatic algae, and some plants (9). The bacterial CCM has two main components: i) an  $\text{C}_i$  pump producing high cytosolic  $\text{HCO}_3^-$ , and ii) co-encapsulation of carbonic anhydrase (CA) and rubisco inside proteinaceous organelles known as carboxysomes (Figure 1A) (10, 11). The timing of carboxysome CCM evolution is uncertain, but it likely arose sometime during the Proterozoic Eon (9). Therefore, for roughly half of Earth's history, bacterial rubiscos have functioned in concert with a system that pumps  $\text{C}_i$  into and around the cell.

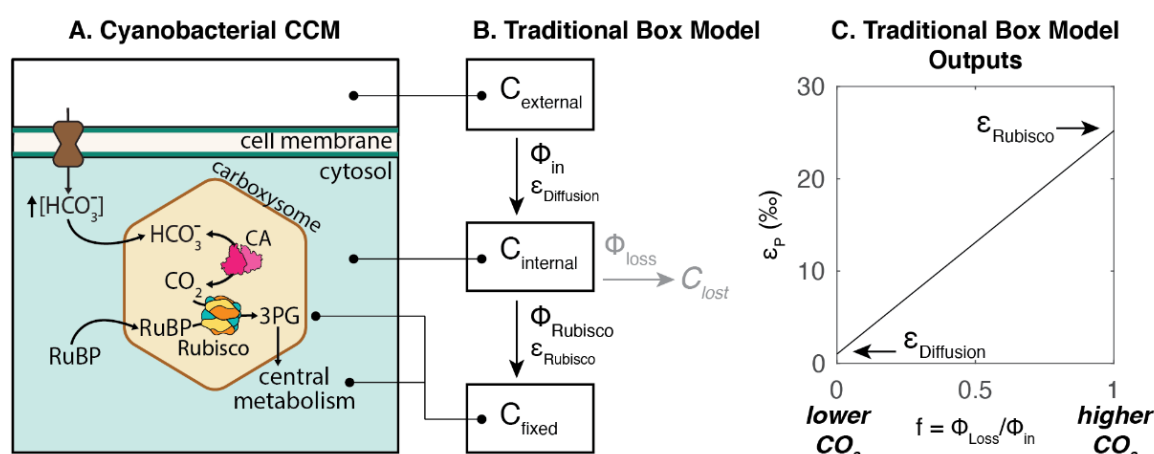

**Figure 1: Cyanobacterial  $\text{CO}_2$  Concentrating Mechanism (CCM) compared to traditional box model architecture and outputs.** A) Cyanobacterial CCMs rely on i) active  $\text{HCO}_3^-$  uptake into the cell; ii) co-encapsulation of carbonic anhydrase (CA) and rubisco within the carboxysome. These components together produce a high carboxysomal  $\text{CO}_2$  concentration that enhances  $\text{CO}_2$  fixation by rubisco and suppresses oxygenation. B) Architecture of the traditional box model based on (12–15) mapped onto a cyanobacterial CCM; see Supplemental for full discussion of this model. Boxes denote carbon pools of interest, and fluxes between boxes are denoted by  $\Phi$ . Each flux has its own isotopic fractionation denoted by  $\epsilon$ ; no fractionation is assumed for  $\Phi_{\text{loss}}$ . Model assumes an infinitely large external carbon pool, that carbon not fixed by rubisco ( $\text{C}_{\text{lost}}$ ) returns to this pool, and that fluxes are at steady state. Note that this

architecture does not include a box for the carboxysome, or fluxes via powered inorganic carbon uptake. C) Model solution is  $\epsilon_P = (1-f)\epsilon_{\text{Diffusion}} + f\epsilon_{\text{Rubisco}}$ , where  $\epsilon_P$  is defined as the difference in  $\delta^{13}\text{C}$  of  $\text{C}_{\text{external}}$  and  $\text{C}_{\text{fixed}}$ , and  $f$  is defined as the ratio of  $\Phi_{\text{loss}}/\Phi_{\text{in}}$ . For this illustration,  $\epsilon_{\text{Rubisco}} = 25\text{‰}$  and  $\epsilon_{\text{Diffusion}} = 1\text{‰}$  is assumed. When  $f = 0$ ,  $\epsilon_P = \epsilon_{\text{Diffusion}}$ , and when  $f = 1$ ,  $\epsilon_P = \epsilon_{\text{Rubisco}}$ .

Over geological timescales, trends in the environmental  $\text{CO}_2$  concentrations and the evolutionary history of carbon fixation and its role in the carbon cycle have been captured, in some noisy manner, in the carbon isotope record. This record is composed of measurements of the relative ratios of  $^{13}\text{C}$  to  $^{12}\text{C}$  isotopes in C-bearing phases in sedimentary rocks over time (reported using the delta notation ( $\delta^{13}\text{C}$ ) and expressed in per mil (‰); see Methods for detail). The carbon isotope record established a time series of touchpoints between biological and geological processes that—if interpreted correctly—might be read to understand the evolution of carbon-fixing processes through time. One key to reading the isotope record is the observation that rubisco displays a kinetic isotope effect (KIE) where it preferentially fixes  $^{12}\text{CO}_2$  over  $^{13}\text{CO}_2$  due to the  $k_{\text{cat}}$  being slightly faster for  $^{12}\text{CO}_2$  than  $^{13}\text{CO}_2$  (16). This results in the reaction product, 3-phosphoglycerate (3-PGA), being relatively depleted in  $^{13}\text{C}$  by several percent (tens of per mil ‰) compared to the overall isotopic composition of the initial  $\text{CO}_2$  substrate. The difference in  $\delta^{13}\text{C}$  of the  $\text{CO}_2$  substrate and the 3-PGA product is typically reported as  $\epsilon_{\text{Rubisco}}$ , and has been measured to vary between 18-30‰ for most extant rubiscos (17, 18), with the exception of rubisco from the coccolithophore *Emiliania huxleyi* at 11‰ (19). Because all resulting biomass is synthesized from 3-PGA in autotrophs utilizing the CBB cycle, biomass is depleted in  $^{13}\text{C}$  compared to external  $\text{C}_i$  pools. The magnitude of this difference is called  $\epsilon_P$ .  $\text{C}_i$  pools are preserved in the rock record in the form of carbonate salts (in limestones and dolomites), while biomass and  $\text{C}_o$  pools are preserved in organic phases (typically kerogen) in a myriad of lithologies and are measured as rock total organic carbon (TOC). There is an additional fractionation factor associated with the preservation of biomass and  $\text{C}_i$  as rocks, so the magnitude of fractionation between  $\text{C}_i$  and  $\text{C}_o$  pools is termed  $\epsilon_{\text{TOC}}$  and varies slightly from  $\epsilon_P$  (20). Overall, if one can accurately convert from  $\epsilon_{\text{TOC}}$  to  $\epsilon_P$ , and then from  $\epsilon_P$  to  $\epsilon_{\text{Rubisco}}$ , one may be able to learn about photosynthetic physiology over time from the rock record.

Much work has been done to address two main observations seen in the carbon isotope record: i) there is variation in  $\epsilon_{\text{TOC}}$  despite its general consistency around 25‰ (18), and ii) organic matter is more  $^{13}\text{C}$ -depleted further back in time compared to today, particularly in Precambrian-age rocks (20–23). If one accepts that these trends are not due to chemical alteration of sediment post-deposition (diagenesis) or other preservation effects (which are expected to have the opposite sign (24)), then one looks for mechanisms that might explain such a change. To date, those efforts have focused on environmental changes (e.g. temperature, pH,  $\text{pCO}_2$ ) that might have led to larger carbon isotope fractionations. Typically, model autotrophs are grown in different conditions, and then a proxy is calibrated that relates carbon isotope fractionation to the chosen environmental condition. Doing so, the community has found that in both lab cultures of photosynthetic algae (25, 26), and from field data of marine algae (13, 27, 28), that increased levels of dissolved  $\text{CO}_2$  in solution corresponded to an increased value of  $\epsilon_P$ . This general observation has been modified and honed by later studies to account for environmental parameters like the effects of temperature and pH on dissolved  $\text{CO}_2$  concentrations, and physiological characteristics like growth rate, cell geometry/type, and

species/strain-type (25, 26, 29). However, even when taking these factors into account, it is still expected that increased concentrations of CO<sub>2</sub> will cause increased values of  $\epsilon_p$  (see (18) for review of factors affecting  $\epsilon_p$ ).

This supposition undergirds the traditional box model of carbon isotope fractionation in algae (12, 13), which was based on a model of carbon isotope fractionation in C3 plants (14, 15), which have no CCM (Figure 1B). This is often referred to as a “diffusion-based” model because CO<sub>2</sub> is assumed to passively diffuse in and out of aquatic cells (like gas exchange through leaf stomata) due to a concentration gradient of external vs. internal CO<sub>2</sub>. A “leakiness” term,  $f$ , can be defined as the ratio of fluxes ( $\Phi$ ) of carbon exiting or entering the cell based on this concentration gradient ( $f = \Phi_{out}/\Phi_{in} = [C_{int}]/[C_{ext}]$ ). In this simplified model,  $\epsilon_p$  is determined by the isotopic effect of two distinct steps: i) the diffusion of CO<sub>2</sub> into the cell ( $\epsilon_{Diffusion}$ ; <1‰ in water at steady state (30)); and ii) the carbon fixation step catalyzed by rubisco ( $\epsilon_{Rubisco}$ ; typically 18-30‰). The model is usually solved by assuming steady state, which results in a linear relationship between  $\epsilon_p$  and  $f$  so that experimentally measured values of  $\epsilon_p$  can be used to solve for  $f$ . This model also sets the minimum and maximum  $\epsilon_p$  values ( $\epsilon_{Diffusion}$  and  $\epsilon_{Rubisco}$  respectively, Fig. 1C) with corresponding physiological interpretations: when  $\epsilon_p \approx \epsilon_{Diffusion}$ , nearly all carbon entering the cell is used and with this mass balance constraint rubisco’s <sup>12</sup>C preference is not expressed; conversely, when  $\epsilon_p \approx \epsilon_{Rubisco}$ , very little of the carbon entering the cell is fixed ( $f \approx 1$ ), rubisco can “choose” between <sup>12</sup>C and <sup>13</sup>C substrates, and the KIE of rubisco can be fully expressed. Therefore, given the assumption that C<sub>i</sub> is taken up passively, it is possible to derive an increasing relationship between C<sub>ext</sub> and  $\epsilon_p$  from this model (see Supplemental and (13)).

One reason that Earth scientists are interested in models of biological carbon isotope fractionation is that it may help constrain historical pCO<sub>2</sub> concentrations. The ice core record, which provides direct observations of the Earth’s atmosphere, extends back only ≈1 million years (31), so, for the remaining four and half billion years of Earth history, model-driven proxies are used (32, 33). However, under the simplified diffusional model,  $\epsilon_p$  cannot exceed  $\epsilon_{Rubisco}$  (Figure 1C), yet the largest  $\epsilon_p$  values observed in the Archaean Eon exceed 30‰ (21, 34) and also exceed all existing measurements of  $\epsilon_{Rubisco}$ . In addition, recent studies in dinoflagellates that showed that  $\epsilon_p$  can regularly exceed  $\epsilon_{Rubisco}$  under certain growth conditions argue that  $\epsilon_p$  reflects additional isotopic fractionations that may occur with carbon uptake processes. This has motivated an updated model of Eukaryotic algae accounting for the estimated isotopic fractionations of different C<sub>i</sub> uptake mechanisms (17).

In addition to taking modern physiology into account, it is important to understand how the evolution of rubisco and the CCM may have also affected the carbon isotope composition of biomass. Recent studies have addressed this issue directly by testing model organisms that may better resemble an ancestral counterpart, including a cyanobacterial strain that lacks a CCM (22), a cyanobacterial strain that overexpresses rubisco (35), and a cyanobacterial strain expressing an inferred ancestral rubisco dating from ≈1-3 Ga in age (36, 37).

Here, we measured the  $\epsilon_p$  of a control strain of *S. elongatus* PCC 7942 expressing the wild-type rubisco (NS2-KanR, referred to as ‘WT’), as well as a mutant expressing an inferred ancestral Form 1B rubisco dating to >1 Ga (referred to as ‘ANC’) (38) in varied CO<sub>2</sub> and light



conditions. In addition, we measured the KIEs of the present-day and ancestral rubiscos ( $\epsilon_{\text{Rubisco}}$ ) *in vitro*. We observed that: i)  $\epsilon_p$  is greater for ANC than for its WT counterpart for all conditions, even though ANC  $\epsilon_{\text{Rubisco}}$  ( $17.23 \pm 0.61\text{‰}$ ) is considerably less than WT  $\epsilon_{\text{Rubisco}}$  ( $25.18 \pm 0.31\text{‰}$ ); ii) ANC  $\epsilon_p$  exceeds  $\epsilon_{\text{Rubisco}}$  in all tested conditions even though the traditional model sets the maximum possible  $\epsilon_p = \epsilon_{\text{Rubisco}}$ ; iii) ANC  $\epsilon_p$  increases with higher light while WT  $\epsilon_p$  increases with higher  $\text{CO}_2$ ; iv) ANC displays a growth defect at ambient  $\text{pCO}_2$  that is rescued at high  $\text{pCO}_2$ ; and v) ANC growth is severely inhibited in high light conditions. ANC  $\epsilon_p$  exceeding  $\epsilon_{\text{Rubisco}}$  implies that the traditional box model is incomplete and additional processes and fractionation factors are needed. In addition, other aspects of cyanobacterial physiology beyond the CBB cycle must be taken into account to explain how  $\epsilon_p$  can vary independently of  $\text{CO}_2$ . We posit additional factors related to  $\text{C}_i$  uptake that might explain fractionation measurements that deviate from box model predictions in both extant and ancient organisms.

## Results & Discussion

### Ancestral Rubisco strain grows at ambient $\text{CO}_2$ concentrations

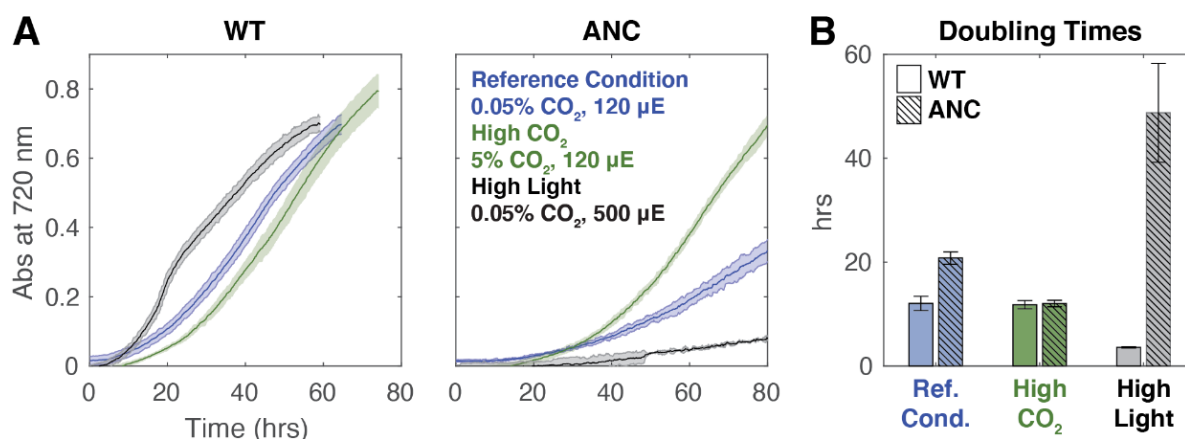

**Figure 2: Growth curves for WT and ANC strains across experimental conditions.** A) Averaged growth curves shown for WT and ANC strains to 80 hours, colored by growth condition as indicated in figure. Data was smoothed with a rolling median (Methods); see full ANC growth curves in Supplemental. B) Average doubling times with standard deviation for growth curves on the left. Doubling times were calculated using a Markov Chain Monte Carlo (MCMC) approach; see Supplemental for details. ANC displayed a growth defect relative to the WT at the reference condition, which was rescued at high  $\text{CO}_2$ . Across all conditions, ANC grew the slowest at high light, while WT grew the fastest.

Working in *S. elongatus* PCC 7942, we produced a mutant strain lacking the native Form 1B rubisco, expressing instead an ancestral Form 1B rubisco produced by computational ancestral sequence reconstruction (Methods). This putative ancestral rubisco was previously purified and characterized *in vitro* (38). We compared the growth of this mutant strain, which we termed 'ANC', to the parent strain (wild-type or 'WT') across several light fluxes and  $\text{CO}_2$  concentrations: i) Reference condition (ambient  $\text{pCO}_2$  (0.05% (v/v)), standard light flux (120  $\mu\text{E}$ )); ii) High  $\text{CO}_2$  (5%  $\text{pCO}_2$  (v/v), 120  $\mu\text{E}$ ); iii) High light (0.05%  $\text{pCO}_2$  (v/v), 500  $\mu\text{E}$ ). Remarkably, the ANC strain managed to grow at ambient  $\text{pCO}_2$  and standard light conditions (Figure 2A), even though the ancestral rubisco has a carboxylation rate ( $V_c$ ) roughly half that of

WT (Table 1). This result is in contrast to another historical analogue strain (lacking CCM genes) that only grew in elevated  $p\text{CO}_2$  (22), but is similar to another ancestral analogue (with a predicted Precambrian Form 1B rubisco) that did grow in under ambient conditions (36).

The difference in  $V_C$  between the ancestral and modern rubiscos was mirrored in the doubling times of WT and ANC strains (Figure 2B, Table S3), where the doubling time of ANC was roughly twice that of WT in the reference condition ( $20.8 \pm 1.2$  vs.  $12.0 \pm 1.4$  hours respectively (avg.  $\pm$  s.d.). In addition, the carboxylation rate normalized to the Michaelis-Menten constant for  $\text{CO}_2$  in air ( $V_C/K_C^{\text{Air}}$ ) for the ancestral Form 1B rubisco, which measures the enzyme's ability to function at low  $\text{CO}_2$  concentrations, is roughly half that of the modern Form 1B rubisco (Table 1; see (38) for full characterization of enzyme kinetics). This suggested that ANC's growth was limited by its ability to fix  $\text{CO}_2$  in a manner proportional to rubisco's carboxylation rate. This growth defect was ameliorated at high  $p\text{CO}_2$ , where doubling times for both strains were the same within uncertainty (WT  $11.8 \pm 0.8$  hours; ANC  $12.0 \pm 0.6$  hours), though we observed a longer lag phase for ANC. WT doubling times were the same within uncertainty for the reference and high  $\text{CO}_2$  conditions ( $12.0 \pm 1.4$  vs.  $11.8 \pm 0.8$  hours respectively) in contrast to ANC, whose doubling times did change in response to elevated  $\text{CO}_2$ . This suggested that  $\text{CO}_2$  availability is a growth-limiting factor for ANC but not WT, and further suggested that the differences in their growth kinetics are related to the efficacy of their CCMs. Consistent with our results, a similar ancestral Form 1B analogue displayed total carboxylase activity roughly half that of the modern Form 1B (39).

We observed the greatest differences in doubling times between ANC and WT when the strains were grown at high light (Figure 2, Table S3). In these conditions, WT cultures were a dark, blue-green color typical of healthy cyanobacterial cells while ANC cultures were yellow-green (Fig. S9), suggesting that ANC cultures were cannibalizing their photosynthetic antennae via a known starvation pathway to reduce the cell's capacity for light harvesting and photochemical electron transport (40). It is likely that ANC could not match its rate of  $\text{CO}_2$  fixation to the rate of light harvesting, and hence invoked this regulatory pathway. WT, in contrast, grew rapidly in the high light condition, ostensibly because its rate of  $\text{CO}_2$  fixation could match the higher light-harvesting rate.

### **Ancestral rubisco enzyme fractionates less than WT rubisco enzyme**

We measured the *in vitro* fractionations of the WT and ANC rubisco using the substrate depletion method ((41–44); see Methods and Supplemental for more details). Previous work on rubisco isotope kinetics predicted that  $\epsilon_{\text{Rubisco}}$  should correlate positively with specificity ( $S_{\text{C/O}}$ ), a unitless measure of the relative preference for  $\text{CO}_2$  over  $\text{O}_2$  (45). We therefore expected ANC and WT  $\epsilon_{\text{Rubisco}}$  values to be the same within uncertainty because of their similar  $S_{\text{C/O}}$  values, but we found that ANC  $\epsilon_{\text{Rubisco}}$  ( $17.23 \pm 0.61\text{‰}$ ) fractionated carbon isotopes during carboxylation about 8‰ less than that of WT  $\epsilon_{\text{Rubisco}}$  ( $25.18 \pm 0.31\text{‰}$ ) (Table 1).

| Rubisco           | $\epsilon_{\text{Rubisco}}$ (‰) | $V_C$ (s <sup>-1</sup> ) | $K_C^{\text{Air}}$ (μM) | $V_C/K_C^{\text{Air}}$ (s <sup>-1</sup> mM <sup>-1</sup> ) | $S_{C/O}$   |
|-------------------|---------------------------------|--------------------------|-------------------------|------------------------------------------------------------|-------------|
| Ancestral Form 1B | 17.23 ± 0.61                    | 4.72 ± 0.14              | 168.7                   | 28                                                         | 49.6 ± 1.8  |
| Modern Form 1B    | 25.18 ± 0.31*                   | 9.78 ± 0.48*             | 184.1*                  | 53.1*                                                      | 50.3 ± 2.0* |

**Table 1: Rubisco characteristics.** Relevant enzyme characteristics for the ancestral vs. modern Form 1B rubisco. Starred values (\*) for the modern Form 1B were measured in rubiscos purified from *Synechococcus* sp. PCC 6301, a close relative of our working WT strain, *Synechococcus* sp. PCC 7942. Kinetic isotope effect ( $\epsilon_{\text{Rubisco}}$ , avg. ± s.e.) was measured using the substrate depletion method (41–44); see Methods and Supplemental for more detail. Rate of carboxylation ( $V_C$ ), Michaelis-Menten constant for CO<sub>2</sub> in ambient air at modern levels of atmospheric O<sub>2</sub> ( $K_C^{\text{Air}}$ ), rate of carboxylation normalized to the Michaelis-Menten constant ( $V_C/K_C^{\text{Air}}$ ), and specificity for CO<sub>2</sub> vs. O<sub>2</sub> ( $S_{C/O}$ ) are from (38); additional details on these values are within.  $S_{C/O}$  is a unitless measure of the relative preference for CO<sub>2</sub> over O<sub>2</sub>, and is calculated as  $(V_C/K_C)/(V_O/K_O)$  where  $K_C$  and  $K_O$  are the Michaelis-Menten constants for CO<sub>2</sub> and O<sub>2</sub> concentrations respectively, and  $V_C$  and  $V_O$  are the carboxylation and oxygenation turnover rate under substrate-saturated conditions.  $V_C/K_C^{\text{Air}}$  measures the ability of rubisco to function at low CO<sub>2</sub> concentrations because it describes the initial response rate of carboxylation to the CO<sub>2</sub> concentration.

#### ANC strain fractionates more than WT strain

Counter to expectations based on enzyme KIEs (Table 1), larger  $\epsilon_p$  values were observed for ANC than WT in all CO<sub>2</sub> and light conditions tested (Figure 3). This was consistent with results from a similar ancestral analog, where larger  $\epsilon_p$  values exceeded WT at ambient and elevated CO<sub>2</sub> levels (36). The highest ANC  $\epsilon_p$  values were observed for cultures grown at high light, where growth was comparatively slow (doubling time ≈ 50 hours, Figure 3 and Table S3). ANC  $\epsilon_p$  values were also modulated by light and CO<sub>2</sub> differently than WT (Figure 3A). Compared to the reference condition, ANC  $\epsilon_p$  values did not increase in high CO<sub>2</sub> and only increased in high light. In contrast, WT  $\epsilon_p$  values were indifferent to high light and only increased in high CO<sub>2</sub>. This result contrasted with the ancestral strain in (36) where  $\epsilon_p$  values increased by ≈10‰ at 2% CO<sub>2</sub>.



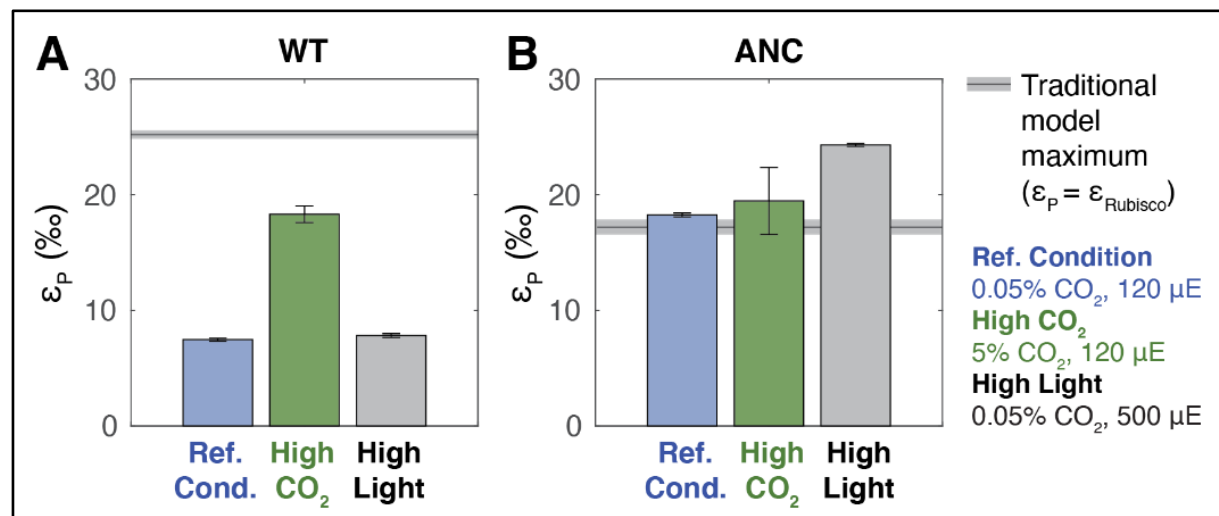

**Figure 3: Whole cell carbon isotope fractionation by WT and ANC strains.**  $\epsilon_P$  (‰) values (avg.  $\pm$  s.e.) for A) WT, and B) ANC strains across growth conditions. For each strain, the maximum  $\epsilon_P$  possible based on the traditional model ( $\epsilon_P = \epsilon_{Rubisco}$ ) is shown as a gray line (avg.  $\pm$  s.e.). Most measured ANC  $\epsilon_P$  values exceed the theoretical limit ( $\epsilon_P > \epsilon_{Rubisco}$ ), while all WT  $\epsilon_P$  values do not ( $\epsilon_P < \epsilon_{Rubisco}$ ). WT  $\epsilon_P$  values increase in response to elevated  $CO_2$  concentrations, while ANC  $\epsilon_P$  values increase in response to elevated light flux. See Supplemental for full results.

In addition, the traditional box model described above cannot accommodate  $\epsilon_P$  values in excess of  $\epsilon_{Rubisco}$  (Figure 1). However, average ANC  $\epsilon_P$  values exceeded ANC  $\epsilon_{Rubisco}$  in all growth conditions (Figure 3), particularly under high light conditions where the largest difference was seen ( $\epsilon_P = 24.30 \pm 0.12\text{‰}$  vs  $\epsilon_{Rubisco} = 17.23 \pm 0.61\text{‰}$ ). The traditional box model also states that  $\epsilon_P$  values are solely modulated by changing external  $pCO_2$  concentrations (Figure 1), which cannot accommodate the ANC  $\epsilon_P$  observations.

### Proposed influence of a light-powered carbonic-anhydrase

The data showed two primary observations that could not be reconciled by the traditional box model: i) ANC  $\epsilon_P$  often exceeds  $\epsilon_{Rubisco}$ , and ii) ANC  $\epsilon_P$  varies primarily with light and not  $CO_2$ . Based on independent knowledge of carbon acquisition strategies in Cyanobacteria, we augmented the traditional box model to include an additional isotope fractionation step, and a parameter affected by light. A good candidate that fulfills both these criteria would be a process that uses energy derived from light to catalyze the energy-coupled unidirectional hydration of  $CO_2$  to  $HCO_3^-$ —a “powered” carbonic anhydrase (CA).

Cyanobacteria have been shown to have two modes of active  $C_i$  uptake: uptake of hydrated  $C_i$  (predominantly  $H_2CO_3$  and  $HCO_3^-$ ) and uptake of  $CO_2$  (46). In order for the CCM to function, either mode would need to produce a high, non-equilibrium concentration of  $HCO_3^-$  in the cytoplasm (9, 11). This is thought to be achieved by coupling CA to an energy source (e.g. light or an ion gradient) that drives the one-way hydration of  $CO_2$  to  $HCO_3^-$  in the cytoplasm (47). There is now excellent data supporting this hypothesis in Cyanobacteria, where accessory proteins that bind to the cyanobacterial homologue of Complex I NADH dehydrogenase (the inducible NDH-1MS or constitutive NDH-1MS') are known to mediate  $CO_2$  uptake specifically (48–50). Additionally, one of these accessory proteins, CupA in NDH-1MS and CupB in NDH-

1MS', is homologous to a carbonic anhydrase and contains a telltale zinc active site situated near a proton channel in a membrane subunit (51). This powered carbonic anhydrase Complex I variant in Cyanobacteria therefore couples inorganic carbon uptake directly to the photochemical electron transport chain. Moreover, a similar protein complex has been described in proteobacterial chemoautotrophs, suggesting that energy-coupled CO<sub>2</sub> hydration is widespread (52).

A unidirectional CA would affect  $\epsilon_p$  for two reasons. First, CO<sub>2</sub> and HCO<sub>3</sub><sup>-</sup> are isotopically distinct. At equilibrium in standard conditions, HCO<sub>3</sub><sup>-</sup> is  $\approx 8\%$  more enriched in <sup>13</sup>C than CO<sub>2</sub> (53, 54). Therefore, if a cyanobacterium is predominantly taking up CO<sub>2</sub>, then the internal C<sub>i</sub> pool from which biomass is formed is isotopically lighter (<sup>13</sup>C-depleted) than if HCO<sub>3</sub><sup>-</sup> is the dominant source of C<sub>i</sub>. Second, unidirectional CO<sub>2</sub> hydration is expected to impart a substantial isotope effect, with calculated values ranging from  $\approx 19$  to  $32\%$  (53, 55–58). Therefore, there are two mechanistic reasons that  $\epsilon_p$  could exceed  $\epsilon_{\text{Rubisco}}$  in conditions where energized CO<sub>2</sub> uptake and hydration is active. Indeed, unidirectional CO<sub>2</sub> hydration has also been proposed to contribute to algal  $\epsilon_p$  values that exceed known algal  $\epsilon_{\text{Rubisco}}$  values (17).

The activity of a powered CA could modulate  $\epsilon_p$  independent of external C<sub>i</sub> concentrations, counter to the traditional model which proposes  $\epsilon_p$  as a direct correlate of external pCO<sub>2</sub> (12, 13). Because his powered CO<sub>2</sub> uptake and hydration is driven by light energy, e.g. via cyclic electron flow around photosystem I (51), this may explain why the highest ANC  $\epsilon_p$  values, those exceeding ANC  $\epsilon_{\text{Rubisco}}$ , were observed under high light conditions. Furthermore, on short timescales ( $\approx$ minutes) cyanobacterial C<sub>i</sub> uptake can be modulated by light intensity alone, fully independent of external C<sub>i</sub> concentrations (59), and CO<sub>2</sub> uptake can occur in the absence of carbon fixation (60, 61). Based on these physiological and isotopic observations, a powered CA is likely responsible for  $\epsilon_p$  values in excess of  $\epsilon_{\text{Rubisco}}$  in ANC.

### Proposed model for carbon isotope fractionation

As discussed above, the traditional box model cannot produce  $\epsilon_p > \epsilon_{\text{Rubisco}}$  (Figure 1). Based on our isotopic data and understanding of cyanobacterial physiology, we proposed a simple modification of the traditional model that can rationalize our measurements of growth and  $\epsilon_p$  for both WT and ANC strains (Figure 4). The traditional box model was able to rationalize our data from WT in the sense that the values of the CO<sub>2</sub> leakage term,  $f$ , fit from  $\epsilon_p$  are compatible with growth (i.e.  $f < 1$ ). In this model,  $f = 1$  implies that all carbon uptake leaks out of the cell. However, using the traditional model on the ANC strain data yields values of  $f$  inconsistent with growth ( $f > 1$ ; Figure 4A), which clearly violates growth curve data that shows ANC was able to grow in all conditions (Figure 2).

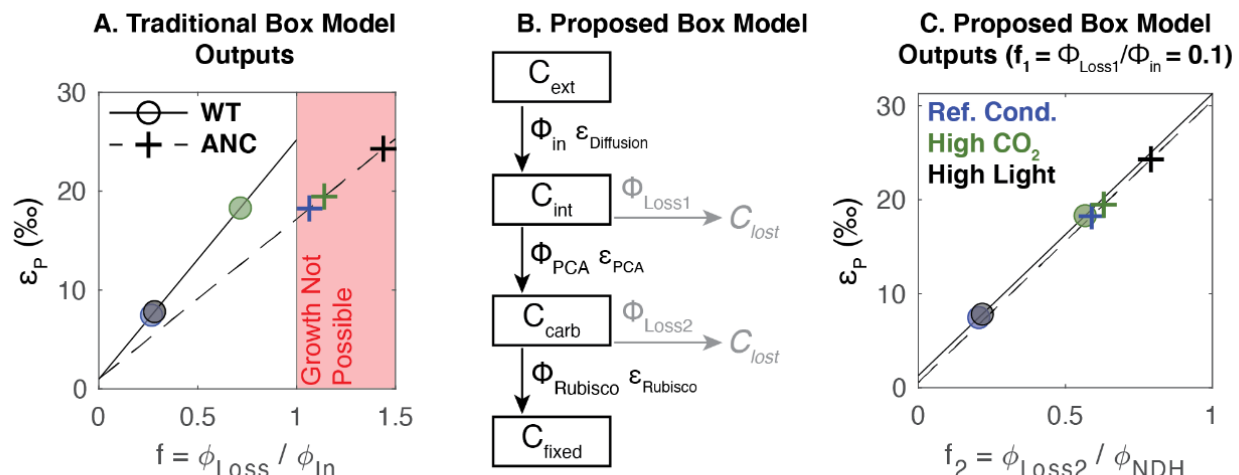

**Figure 4: Proposed box model based on experimental results.** A) Experimental results (circles and crosses) plotted onto traditional box model outputs (dashed and solid lines) for WT and ANC respectively. Uncertainties are smaller than data points. Colors indicate growth conditions: blue = reference condition (0.05% pCO<sub>2</sub> (v/v), 120  $\mu$ E); green = high CO<sub>2</sub> (5% pCO<sub>2</sub> (v/v), 120  $\mu$ E); black = high light (0.05% pCO<sub>2</sub> (v/v), 500  $\mu$ E).  $f$  is as defined in Figure 1; region where  $f > 1$  is shaded in red. B) Proposed box model architecture, with main carbon pools of interest in boxes. Subscripts indicate external (*ext*), internal (*int*), carboxysome (*carb*), and fixed (*fixed*) carbon pools. Fluxes are denoted by  $\Phi$  where subscripts indicate fluxes into the cell (*in*), out of the cell (*Loss1*, *Loss2*), into the carboxysome (*PCA* for *Powered Carbonic Anhydrase*), and into fixed biomass (*Rubisco*), each with a corresponding isotopic fractionation denoted with  $\epsilon$ . Loss fluxes were assumed to have no isotopic fractionation. In this proposed model,  $f_1$  is defined as  $\Phi_{Loss1} / \Phi_{In}$ , and  $f_2$  is defined as  $\Phi_{Loss2} / \Phi_{PCA}$ . See text for model assumptions. C) Experimental results plotted onto proposed box model outputs for  $f_1 = 0.1$ ; colors and symbols are the same as Panel A.  $\epsilon_p$  is defined as the difference in  $\delta^{13}C$  between  $C_{ext}$  and  $C_{fixed}$ . See Supplemental for full solution and results; only results for  $f_1 = 0.1$  are shown. All analyses were performed using MATLAB and Statistics Toolbox (vR2020b).

We therefore modified the traditional box model by making a distinction between carbon in the cytosol ( $C_{int}$ ) and carbon in the carboxysome ( $C_{carb}$ ), and by adding an additional path whereby carbon can be lost from the carboxysome ( $\Phi_{Loss2}$ , Figure 4B). In this modified model, external  $C_i$  enters the cell (flux  $\Phi_{in}$ ) where it can either leak out ( $\Phi_{Loss1}$ ) or undergo active hydration (flux  $\Phi_{PCA}$ , where *PCA* denotes *Powered Carbonic Anhydrase*). Intracellular  $C_i$  can then enter the carboxysome, where it is either fixed (flux  $\Phi_{Rubisco}$ ) or ultimately leaks out of the cell (flux  $\Phi_{Loss2}$ ). We made similar simplifying assumptions as the traditional box model: i) an infinite supply of external carbon, ii) no isotopic fractionation for carbon lost from the cell, iii)  $\Phi_{in}$  has the isotopic fractionation associated with  $\epsilon_{Diffusion}$ , and iv) the system is at steady state. We did not add an explicit term for light energy used to power  $C_i$  uptake. Instead, the model included an energized CA (denoted *PCA*) and its associated isotopic fractionation as free parameters. In modeling each strain, we used the appropriate  $\epsilon_{Rubisco}$  measurements (Table 1). We do not know the true value for  $\epsilon_{PCA}$ , but used a value of 30‰ similar to recent models of a one-way CA in eukaryotic algae (62). For comparison with the traditional model, we plotted Figure 4C with  $f_1 = 0.1$  so that it could be represented in two dimensions. However, in this updated model, each value of  $\epsilon_p$  corresponds to a set of feasible  $f_1$  and  $f_2$  values that fall along a line (Figure S7 and S8 for WT and ANC respectively). Therefore, our model constrains but does

not uniquely determine  $f_1$  and  $f_2$ , nor does it allow for estimation of external  $C_i$  levels precisely because many pairs of  $f_1$  and  $f_2$  values can produce the same  $\epsilon_p$  value.

With the addition of a powered CA and an additional loss term, the model was able to rationalize our experimental data of  $\epsilon_p > \epsilon_{\text{Rubisco}}$  with leakage values compatible with cell growth ( $f_2 < 1$ ) (Figure 4C). Our model results implied that, overall, ANC lost more carbon than WT at the branch point before rubisco ( $\Phi_{\text{Loss2}}$ ); i.e. even though carbon was present in the cell, it could not be fixed by the ancestral Form 1B rubisco because of its slower carboxylation rate. The excess amount of  $\text{CO}_2$  available then allowed rubisco's kinetic isotope effect ( $\epsilon_{\text{Rubisco}}$ ) to be expressed. In addition, the model indicated that this effect would be exacerbated at high light (Figure 4C), which is consistent with the low ANC doubling rates seen in this condition (Figure 2). These results implied that at high light, the powered CA was delivering high amounts of  $\text{CO}_2$  to both the WT and ANC rubisco. WT was able to keep up with this flux, which was reflected in its fast growth rate (Figure 2) and no change in  $\epsilon_p$  vs. the reference condition (Figure 3). However, ANC was not, which led to its slowest growth rate (Figure 2), and highest  $\epsilon_p$  values across all conditions.

These results showed that other processes relevant to the CCM, in addition to rubisco, can play an important role in  $\epsilon_p$  values. While our approach is highly idealized and relies on a minimum set of fractionating processes associated with carbon fixation in Cyanobacteria (adding only one additional fractionation factor, and one additional leakage point), the results demonstrated that a simple addition to the traditional model accounting for a known mode of energized  $\text{CO}_2$  uptake could explain our experimental results. Moreover, one useful implication of this model is that carbon isotope values may measure the efficiency of the CCM and carbon fixation in Cyanobacteria, as much as or more than it informs ambient environmental  $\text{CO}_2$  concentrations.

## Consequences for understanding the evolution of carbon-fixing metabolism

The traditional box model used to describe  $\epsilon_p$  values observed in the biomass of oxygenic photoautotrophs can produce  $\epsilon_p$  values ranging from  $\epsilon_{\text{diffusion}}$  to  $\epsilon_{\text{Rubisco}}$  (Figure 1). However, we and others have observed anomalous  $\epsilon_p$  values exceeding  $\epsilon_{\text{Rubisco}}$  in a variety of modern and synthetic organisms. Over Earth history,  $\epsilon_p$  values inferred from the carbon isotope record sometimes exceed the largest measured modern  $\epsilon_{\text{Rubisco}}$  (21, 34). Explaining these diverse observations has moved us and others to posit the presence of additional fractionating processes beyond rubisco carboxylation contributing to measured  $\epsilon_p$  values. One reasonable explanation is the presence of a one-way CA reaction, which carries a large kinetic isotope effect of  $\approx 30\text{‰}$  (53, 55–58).

This notion was first proposed more than 20 years ago based on measurements of cyanobacterial cultures with  $\epsilon_p$  values exceeding  $30\text{‰}$  (63). Recent measurements of  $\epsilon_p > \epsilon_{\text{Rubisco}}$  motivated similar conclusions regarding multiple fractionating processes in eukaryotic algae (17). In these diverse experiments, anomalous  $\epsilon_p$  values were observed during relatively slow growth; in (63)  $\epsilon_p > \epsilon_{\text{Rubisco}}$  occurred early in the growth curve as cells were acclimating to fresh culture media, in (17)  $\epsilon_p > \epsilon_{\text{Rubisco}}$  occurred during nitrogen and phosphorus limitation, and in this study  $\epsilon_p > \epsilon_{\text{Rubisco}}$  was observed in a mutant strain growing slowly while expressing a

reconstructed ancestral rubisco. These observations indicated that growth physiology affects isotopic fractionation by photosynthetic algae and, in all cases, motivated a rethinking of the traditional box model (Figure 1) to include more physiological detail relating to the presence of a CO<sub>2</sub> concentrating mechanism.

Prior studies also worked to account for issues related to growth physiology—specifically growth rate, cell shape and size—to adapt the C3 plant model to unicellular algae (25). However, that landmark study measured  $\epsilon_p$  in wild-type Cyanobacteria—the same wild-type strain studied here—and, unlike this study and (39), found  $\epsilon_p$  to be roughly constant independent of environmental pCO<sub>2</sub> and growth rate. Popp and coauthors hypothesized that this observed independence stems from the large surface area to volume ratio (SA/V) of Cyanobacteria, which was taken to imply much faster passive CO<sub>2</sub> uptake (scaling with SA) than fixation (scaling with V). Because cyanobacterial  $\epsilon_p$  was constant  $\approx 17\text{‰}$  and less than known cyanobacterial  $\epsilon_{\text{Rubisco}}$  values, additional fractionating factors were not needed to explain  $\epsilon_p$ , even though some active transport processes in Cyanobacteria were known at the time; the simple linear relationship between pCO<sub>2</sub> and  $\epsilon_p$  in C3 plants appeared to hold up in algae and Cyanobacteria as well.

This linear relation between pCO<sub>2</sub> and  $\epsilon_p$  does not hold for our ANC strain (Figure 3). We emphasize that ANC is not a true ancestral Cyanobacteria; rather it is a chimeric construct—a modern strain saddled with a Precambrian enzyme for its carbon fixation. This reconstructed ancestral rubisco is characterized by slower carboxylation kinetics (38) and a much lower  $\epsilon_{\text{Rubisco}}$  (Table 1). In ANC, we observed anomalous  $\epsilon_p$  values exceeding  $\epsilon_{\text{Rubisco}}$  in all growth conditions, but especially in high light (Figure 3). As high light consistently slowed growth, induced chlorosis (yellowing of cultures, Figure S9) and increased  $\epsilon_p$ , we were motivated to consider the effects of light-related physiology on  $\epsilon_p$ . The yellowing of ANC cultures in high light was consistent with the well-described phycobilisome degradation pathway, which is typically induced in nutrient starvation conditions and taken to indicate that light levels exceeded the downstream capacity for CO<sub>2</sub> fixation (40, 64). We interpreted these observations as indicating that the replacement of the native rubisco with a reconstructed ancestor decreased the cellular capacity for CO<sub>2</sub> fixation, potentially due to (i) the inferior kinetics of the ancestral enzyme (Table 1) and (ii) potentially a partial incompatibility with the modern CCM, e.g. sub-optimal recruitment to the carboxysome (65).

Low CO<sub>2</sub> fixation capacity would not, on its own, explain anomalously high  $\epsilon_p$  values, however. An additional fractionating process is required to explain  $\epsilon_p$  values in excess of  $\epsilon_{\text{Rubisco}}$ , which we assumed is due to light-coupled one-way hydration of CO<sub>2</sub>, which has a large calculated isotope effect (53, 55–58). Cyanobacteria have been shown to take up CO<sub>2</sub> independently of HCO<sub>3</sub><sup>-</sup> (46). In model Cyanobacteria, this activity is due to the Cup proteins (CupAS/B, also known as Chp proteins), which bind to the NADH-dehydrogenase-like complex (NDH-1) of Cyanobacteria (51, 66). The NDH-1 complex is involved in light energy capture via photosynthetic electron transport and cyclic electron flow around photosystem I (51) and, moreover, CO<sub>2</sub> uptake is stimulated by light alone and abrogated by inhibitors of photochemical electron transport (59). Not only has CupA been shown to carry a key Zn<sup>2+</sup> in a domain resembling a carbonic anhydrase (51), but the *cupA* gene is induced under low CO<sub>2</sub> conditions (66). In order for CO<sub>2</sub> uptake to drive the CCM and promote CO<sub>2</sub> fixation, it would need to



produce a high, non-equilibrium  $\text{HCO}_3^-$  concentration in the cytoplasm (9, 11). We and others therefore assumed that the complex of NDH-1 and CupAS/B (termed NDH-1<sub>3/4</sub> in the literature) couples light energy to the one-way hydration of  $\text{CO}_2$  to  $\text{HCO}_3^-$  at a carbonic anhydrase-like active site (51).

It is readily apparent that  $\epsilon_{\text{Rubisco}}$  does not set an upper bound on  $\epsilon_p$ , nor does it predict which strains will have larger  $\epsilon_p$  values *in vivo* (Figure 3). This inference was only possible because we measured the isotope fractionation due to the ancestral rubisco ( $\epsilon_{\text{Rubisco}}$ ) and compared it to ANC strain biomass ( $\epsilon_p$ ), in contrast with the study of (39), which only measured  $\epsilon_p$ . While our ANC  $\epsilon_p$  values ( $\approx 18\text{--}24\text{‰}$ ) fell within the range of  $\epsilon_p$  values derived from the carbon isotope record (22), they exceeded the measured  $\epsilon_{\text{Rubisco}}$  (Figure 3). As such, the relative consistency of ANC  $\epsilon_p$  values does not indicate that the traditional box model is applicable across geologic time as claimed in (39). Rather, a model including some additional fractionating process is required to explain our observation that  $\epsilon_p > \epsilon_{\text{Rubisco}}$  in ANC. Attention has been paid to outliers where  $\epsilon_p$  exceeds  $\epsilon_{\text{Rubisco}}$  precisely because they violate the assumptions underlying the dominant model used to interpret the carbon isotope record (17). In addition, ANC  $\epsilon_{\text{Rubisco}}$  ( $17.23 \pm 0.61\text{‰}$ ) is anomalously low; not only is it  $\approx 8\text{‰}$  less than WT  $\epsilon_{\text{Rubisco}}$  ( $25.18 \pm 0.31\text{‰}$ ) but it is among the lowest measured rubisco KIEs. However, only thirteen unique rubisco KIEs have been measured thus far (for recent review see (18)) while  $\approx 300$  distinct rubiscos have been kinetically characterized (7, 67).

The carbon isotope record has been used to reconstruct  $p\text{CO}_2$  measurements for the vast majority of Earth's history (32, 33) because more direct observations of the past atmosphere from ice only extend back  $\approx 1$  million years (31). The large carbon isotope fractionation between  $C_i$  and  $C_o$  (imparted by rubisco) observed in modern environments roughly matches the carbon isotope differences between carbonates and kerogen-rich rocks in the geological record. Because of this correlation and prior work, it has been assumed that proxies calibrated on modern oxygenic photoautotrophs over short timescales can largely be applied to ancient samples to infer paleo- $p\text{CO}_2$  concentrations. However, our study suggests that the carbon isotopic fractionations observed in both modern environments and throughout the geological record reflect not just the environmental abundance of  $\text{CO}_2$  and/or the rubisco present, but also the operation of  $C_i$  uptake processes like the NDH-1 complex discussed above.

As shown in the companion paper by Avi Flamholz and coauthors, a CCM is not required in the early atmosphere, where a variety of proxies generally agree that  $p\text{CO}_2$  was very high (up to  $\approx 0.8$  bar) (68). However, Flamholz et al. found that expression of carbonic anhydrases or  $C_i$  uptake systems greatly improved autotrophic growth in intermediate  $\text{CO}_2$  levels ( $\approx 1\%$  partial pressure)—levels that are thought to have been important for perhaps much of Precambrian time (69). These results indicated that oxygenic photoautotrophs expressing energized  $\text{CO}_2$  uptake may have arisen relatively early in Earth's history, and rubisco has likely operated in concert with some sort of CCM over Proterozoic time (9). Therefore, a uniformitarian

framework is unjustified: a model that omits all aspects of the CCM (e.g. the traditional box model) might apply early in Earth history if  $p\text{CO}_2$  was sufficiently high, but would not necessarily apply to ancient or modern Cyanobacteria they all express complexes catalyzing light-driven, energized  $\text{CO}_2$  uptake (or any other processes associated with large carbon isotope fraction).

A carbon isotope model that engages more fully with photosynthetic physiology, i.e. one which includes some representation of the CCM (Figure 4), is required to describe  $\epsilon_p$  values and more accurately constrain environmental  $\text{CO}_2$  concentrations from environmental context (e.g. light and nutrient levels) and physiological parameters (e.g.  $\epsilon_{\text{Rubisco}}$ , photosynthetic capacity, growth rate). Notably, the model proposed here represents only a first step in this direction as it substantially simplifies the bacterial CCM (11); a similar statement applies to box models of Eukaryotic algae, which also express complex CCMs (17, 70). Future work on carbon isotope fractionation by cyanobacteria should grapple in more detail with photosynthetic physiology, including the separate uptake of  $\text{C}_i$  from external  $\text{CO}_2$  and  $\text{HCO}_3^-$  pools, integration of both light and dark reactions, and effects of nutrient limitation. As mechanistic biochemical understanding of cyanobacterial  $\text{C}_i$  uptake improves (51), it may also become feasible to directly measure or better constrain the isotopic fractionation associated with these processes. Coupling such a model with experiments in natural and engineered organisms will help validate the model and improve our ability to understand environmental and evolutionary changes to the carbon cycle across Earth history.

Carbon fixation was a fundamental challenge that autotrophs overcame early in the history of Earth's biosphere (8). These early processes were recorded in some fashion in the carbon isotope record, but robust interpretation of this record must take into account that the carbon cycle is an amalgam of both environmental changes and evolutionary processes, mediated by physiology. As a starting place, Earth scientists often apply uniformitarian assumptions (i.e. assuming that physical and chemical processes behave the same now as they did billions of years ago) in order to reason about the past. Such an approach is powerful but these assumptions are challenged by biological processes that undergo substantial evolution on geologic timescales. Recent work has used statistical inference to reconstruct ancestral gene sequences and resurrect ancient proteins in order to study biological evolution over geologic timescales; and was used to reconstruct the ancestral rubisco studied here (38). Here, and in the companion paper by Flamholz et al., we took a "synthetic biological" approach, constructing modern organisms with ancestral components so that specific aspects of ancient organisms can be isolated and tested. These "ancestral-like" organisms helped sharpen our understanding of the physiological and environmental factors determining growth (Flamholz et al.) and isotopic fractionation (this work) in both ancient and modern autotrophs, and showed that models rigidly based on modern taxa are likely not universally applicable across geologic timescales. However, we now have synthetic biological approaches that offer a way to probe these long timescale co-evolutionary problems by producing ancient process analogs of carbon fixation in the laboratory.

## Materials and Methods

### **Ancestral enzyme reconstruction**

Ancestral Rubisco enzyme sequences were previously reported and characterized by Shih et al. (2016) (38). Briefly, for both the large subunit (LSU) and small subunit (SSU) of Rubisco, encoded by *rbcL* and *rbcS* respectively, the most recent common ancestor (MRCA) for Form 1A ( $\alpha$ ), 1B ( $\beta$ ), and 1A/B ( $\alpha/\beta$ ) clades were predicted from independently derived phylogenetic trees for RbcL and RbcS containing a broad diversity of Form 1A and 1B Rubisco (>100 sequences). Maximum-likelihood algorithms were used to reconstruct the most probable ancestral sequence for each clade. Ancestral sequences were then expressed in *Escherichia coli* and purified, and enzyme kinetics were measured.

### ANC strain generation

The 'ANC' strain studied here was generated by replacing the native large and small Rubisco subunits (*cbbL* and *cbbS* respectively) of the parent strain (*Synechococcus elongatus* PCC 7942) with the reconstructed  $\beta$  ancestral *cbbL* and *cbbS* sequences. The NS2-KanR ('WT' strain) was generated by inserting a KanR cassette into neutral site 2 (NS2) (GenBank: U44761.1). *Synechococcus elongatus* PCC 7942 were transformed using the approach of Golden and Sherman (1984) (71). Briefly, cultures were grown to OD750nm = 0.5. Cultures were centrifuged at 18,000 x *g* for 2 minutes. Pellets were washed with 100 mM CaCl<sub>2</sub> and spun again at 18,000 x *g* for 2 minutes. Pellets were resuspended in BG-11 media followed by addition of plasmid and grown for 16 hours in the dark at 30°C. Transformants were then plated onto BG-11 + KAN100 agar plates and placed under 100  $\mu$ E of light at 30°C. Single colonies were then genotyped by PCR amplification of the Rubisco locus followed by sequencing. Table S1 lists plasmids and primers used in this study.

### Growth conditions

For ambient CO<sub>2</sub> growth, NS2-KanR and  $\beta$  Ancestral Rubisco-KanR strains were grown in quadruplicate in a photobioreactor (Photon Systems Instruments - MC 1000) at the University of California, Berkeley (UC Berkeley) for four biological replicates total. Cultures were grown in buffered BG-11 media with 50mM HEPES at pH 8. Cultures were inoculated at a starting OD720nm = 0.015 and cultivated at 120  $\mu$ E, 30°C, and bubbled with ambient air. High CO<sub>2</sub> growth was performed using the same conditions as ambient growth with the exception of placing the photobioreactor in a 5% CO<sub>2</sub> chamber (Percival AR22L) and bubbling in air from the chamber. High light growth was performed using the ambient conditions above with the exception of using 500  $\mu$ E for light intensity. Cells were harvested by centrifugation at 6000 x *g* for 20 minutes at 4°C. Decanted pellets were then flash frozen with liquid N<sub>2</sub> and lyophilized overnight with the Millrock Technology Model BT85A freeze dryer. Doubling time was calculated by fitting the exponential phase of growth (*k*) using a Markov Chain Monte Carlo (MCMC) approach, using the generic model  $y = a \cdot \text{EXP}(k \cdot x) + b$ . Growth curves displayed in Figure 2 were smoothed with a rolling median (*n* = 12) to remove errant readings caused by bubbles advected in front of the detector. See Supplemental for more information.

### Carbon isotope analysis

Carbon isotope data is reported using delta notation ( $\delta^{13}\text{C}$ ) in units of per mille (‰) where  $\delta^{13}\text{C} = [({}^{13}\text{C}/{}^{12}\text{C})_{\text{sa}}/({}^{13}\text{C}/{}^{12}\text{C})_{\text{ref}} - 1] \cdot 1000$ , where the subscripts 'sa' and 'ref' denote sample and reference respectively. The reference used is the Vienna Pee Dee Belemnite (VPDB).  $\delta^{13}\text{C}$

values of cyanobacterial cells were measured on an EA-IRMS (Elemental Analyzer Isotope Ratio Mass Spectrometer; Costech Thermo Delta-V) at the California Institute of Technology (Caltech) in Pasadena, CA. Each biological replicate was run four times with two different isotope standards – urea (-27.8‰) and sucrose (-10.45‰). A suite of urea and sucrose standards were run at the beginning, middle, and end of run for sample bracketing and to assess drift throughout the run. An average  $\delta^{13}\text{C}$  and standard error were calculated and reported for each biological replicate (see Supplemental for more information). The  $\delta^{13}\text{C}$  of the starting  $\text{CO}_2$  gas was measured on the Thermo Mat 253 Ultra at Caltech. The CALT-2049C standard was used, which has a  $\delta^{13}\text{C}_{\text{VPDB}}$  value of -3.62‰.  $\text{CO}_2$  gas from high  $p\text{CO}_2$  experiments was sourced from a  $\text{CO}_2$  tank, while the  $\text{CO}_2$  gas in ambient  $p\text{CO}_2$  experiments was distilled from ambient lab air through cryogenic distillation at Caltech.  $\epsilon_p$ , the carbon isotope fractionation between  $\text{CO}_2$  gas and bulk cyanobacterial cells, was calculated as  $(\alpha_{\text{CO}_2/\text{bio}} - 1) \times 1000$ , where  $\alpha_{\text{CO}_2/\text{bio}} = {}^{13}\text{R}_{\text{CO}_2}/{}^{13}\text{R}_{\text{bio}}$ , where  ${}^{13}\text{R}$  is the ratio of  ${}^{13}\text{C}$  to  ${}^{12}\text{C}$  in the analyte. We note this in contrast to other isotope literature where  $\epsilon_p$  is calculated as  $\alpha_{\text{bio}/\text{CO}_2} - 1) \times 1000$ , which would cause the positive values in this study to be negative. In this study, more positive  $\epsilon_p$  values indicate more C-13 depleted; see Supplemental for more detail.

### Rubisco KIE assay

*Syn6301* and  $\beta$ -MRCA Rubisco were purified according to previous methodologies (72, 73) at University of California, Davis and then shipped on dry ice to Caltech. Clarified lysate from a BL21 DE3 Star *E. coli* culture expressing Rubisco was subjected to ammonium sulfate precipitation, at the 30-40% cut for *Syn6301* and at the 40-50% cut for  $\beta$ -MRCA, followed by anion exchange chromatography and size exclusion chromatography. We then used the substrate depletion method to measure the KIE of the *Syn6301* and  $\beta$ -MRCA Rubiscos ( $\epsilon_{\text{Rubisco}}$ ), as used previously in similar studies (41–44). Briefly, an assay mix of  $\text{HCO}_3^-$ , bovine carbonic anhydrase, Rubisco, ribulose 1,5-bisphosphate (RuBP),  $\text{MgCl}_2$ , bicine, and dithiothreitol (DTT) was prepared. As the reaction progressed to completion, aliquots of that assay mix were injected into pre-filled exetainers containing phosphoric acid that both stopped the reaction and converted all inorganic carbon species to gaseous  $\text{CO}_2$ . The  $\delta^{13}\text{C}$  of these  $\text{CO}_2$  aliquots was then measured on a Delta-V Advantage with Gas Bench and Costech elemental analyzer at Caltech. Here, instead of RuBP being given in excess,  $\text{CO}_2$  was given in excess. In addition, instead of determining the fraction of  $\text{CO}_2$  ( $f$ ) consumed independently to create a Rayleigh plot, we fit the curvature of the  $\delta^{13}\text{C}$  results to find  $f$  before converting to a Rayleigh plot to calculate  $\epsilon_{\text{Rubisco}}$ , similar to previous studies (42). See Supplemental for more information.

### Acknowledgments

We thank Newton Nguyen for valuable guidance in the MCMC model used to calculate doubling times from growth curve data. We thank Victoria Orphan and Alex Sessions for access to lab space and analytical instruments, as well as lab managers Stephanie A. Connon, Fenfang Wu, and Nami Kitchen for assistance. This research was supported by the David and Lucille Packard Foundation (12540178), Simons Foundation, NASA Exobiology (00010652), and the Schwartz-Reisman Collaborative Science Program (12520057). R.Z.W. was supported by a

648 National Science Foundation Graduate Research Fellowship. Work in the lab of D.F.S. was  
649 supported by the US Department of Energy (DE-SC00016240).

## 650 References

- 651  
652  
653
- 654 Bibliography
- 655 1. J. Gutknecht, M. A. Bisson, F. C. Tosteson, Diffusion of carbon dioxide through lipid bilayer  
656 membranes: effects of carbonic anhydrase, bicarbonate, and unstirred layers. *J. Gen. Physiol.* **69**,  
657 779–794 (1977).
  - 658 2. Y. M. Bar-On, R. Milo, The global mass and average rate of rubisco. *Proc Natl Acad Sci USA* **116**,  
659 4738–4743 (2019).
  - 660 3. S. G. Wildman, Along the trail from Fraction I protein to Rubisco (ribulose biphosphate  
661 carboxylase-oxygenase). *Photosyn. Res.* **73**, 243–250 (2002).
  - 662 4. G. H. Lorimer, T. J. Andrews, Plant photorespiration—an inevitable consequence of the existence  
663 of atmospheric oxygen. *Nature* **243**, 359–360 (1973).
  - 664 5. T. J. Andrews, G. H. Lorimer, *The Biochemistry of Plants: A Comprehensive Treatise, Vol. 10,*  
665 *Photosynthesis*, M. D. Hatch, N. K. Boardman, Eds. (1987).
  - 666 6. A. Bar-Even, *et al.*, The moderately efficient enzyme: evolutionary and physicochemical trends  
667 shaping enzyme parameters. *Biochemistry* **50**, 4402–4410 (2011).
  - 668 7. A. I. Flamholz, *et al.*, Revisiting Trade-offs between Rubisco Kinetic Parameters. *Biochemistry* **58**,  
669 3365–3376 (2019).
  - 670 8. W. W. Fischer, J. Hemp, J. E. Johnson, Evolution of oxygenic photosynthesis. *Annu. Rev. Earth*  
671 *Planet. Sci.* **44**, 647–683 (2016).
  - 672 9. A. Flamholz, P. M. Shih, Cell biology of photosynthesis over geologic time. *Curr. Biol.* **30**, R490–  
673 R494 (2020).
  - 674 10. B. D. Rae, B. M. Long, M. R. Badger, G. D. Price, Functions, compositions, and evolution of the two  
675 types of carboxysomes: polyhedral microcompartments that facilitate CO<sub>2</sub> fixation in cyanobacteria  
676 and some proteobacteria. *Microbiol. Mol. Biol. Rev.* **77**, 357–379 (2013).
  - 677 11. N. M. Mangan, A. Flamholz, R. D. Hood, R. Milo, D. F. Savage, pH determines the energetic  
678 efficiency of the cyanobacterial CO<sub>2</sub> concentrating mechanism. *Proc Natl Acad Sci USA* **113**,  
679 E5354–62 (2016).
  - 680 12. J. M. Hayes, Factors controlling <sup>13</sup>C contents of sedimentary organic compounds: Principles and  
681 evidence. *Mar. Geol.* **113**, 111–125 (1993).
  - 682 13. R. Francois, *et al.*, Changes in the δ<sup>13</sup>C of surface water particulate organic matter across the  
683 subtropical convergence in the SW Indian Ocean. *Global Biogeochem. Cycles* **7**, 627–644 (1993).
  - 684 14. R. Park, S. Epstein, Carbon isotope fractionation during photosynthesis. *Geochim. Cosmochim.*  
685 *Acta* **21**, 110–126 (1960).
  - 686 15. G. D. Farquhar, M. H. O’Leary, J. A. Berry, On the relationship between carbon isotope  
687 discrimination and the intercellular carbon dioxide concentration in leaves. *Aust. J. Plant Physiol.* **9**,



- 688 121 (1982).
- 689 16. G. D. Farquhar, J. R. Ehleringer, K. T. Hubick, Carbon Isotope Discrimination and Photosynthesis.  
690 *Annu. Rev. Plant Physiol. Plant Mol. Biol.* **40**, 503–537 (1989).
- 691 17. E. B. Wilkes, A. Pearson, A general model for carbon isotopes in red-lineage phytoplankton:  
692 Interplay between unidirectional processes and fractionation by RubisCO. *Geochim. Cosmochim.*  
693 *Acta* (2019) <https://doi.org/10.1016/j.gca.2019.08.043>.
- 694 18. A. K. Garcia, C. M. Cavanaugh, B. Kacar, The curious consistency of carbon biosignatures over  
695 billions of years of Earth-life coevolution. *ISME J.* (2021) [https://doi.org/10.1038/s41396-021-00971-](https://doi.org/10.1038/s41396-021-00971-5)  
696 5.
- 697 19. A. J. Boller, P. J. Thomas, C. M. Cavanaugh, K. M. Scott, Low stable carbon isotope fractionation  
698 by coccolithophore RubisCO. *Geochim. Cosmochim. Acta* **75**, 7200–7207 (2011).
- 699 20. J. M. Hayes, H. Strauss, A. J. Kaufman, The abundance of <sup>13</sup>C in marine organic matter and  
700 isotopic fractionation in the global biogeochemical cycle of carbon during the past 800 Ma. *Chem.*  
701 *Geol.* **161**, 103–125 (1999).
- 702 21. J. Krissansen-Totton, R. Buick, D. C. Catling, A statistical analysis of the carbon isotope record  
703 from the Archean to Phanerozoic and implications for the rise of oxygen. *Am. J. Sci.* **315**, 275–316  
704 (2015).
- 705 22. S. J. Hurley, B. A. Wing, C. E. Jasper, N. C. Hill, J. C. Cameron, Carbon isotope evidence for the  
706 global physiology of Proterozoic cyanobacteria. *Sci. Adv.* **7** (2021).
- 707 23. M. Schoell, F. W. Wellmer, Anomalous <sup>13</sup>C depletion in early Precambrian graphites from Superior  
708 Province, Canada. *Nature* **290**, 696–699 (1981).
- 709 24. D. J. Des Marais, Isotopic evolution of the biogeochemical carbon cycle during the precambrian.  
710 *Reviews in Mineralogy and Geochemistry* **43**, 555–578 (2001).
- 711 25. B. N. Popp, *et al.*, Effect of phytoplankton cell geometry on carbon isotopic fractionation. *Geochim.*  
712 *Cosmochim. Acta* **62**, 69–77 (1998).
- 713 26. E. A. Laws, B. N. Popp, R. R. Bidigare, M. C. Kennicutt, S. A. Macko, Dependence of phytoplankton  
714 carbon isotopic composition on growth rate and [CO<sub>2</sub>]<sub>aq</sub>: Theoretical considerations and  
715 experimental results. *Geochim. Cosmochim. Acta* **59**, 1131–1138 (1995).
- 716 27. K. H. Freeman, J. M. Hayes, Fractionation of carbon isotopes by phytoplankton and estimates of  
717 ancient CO<sub>2</sub> levels. *Global Biogeochem. Cycles* **6**, 185–198 (1992).
- 718 28. G. H. Rau, T. Takahashi, D. J. Des Marais, Latitudinal variations in plankton delta <sup>13</sup>C: implications  
719 for CO<sub>2</sub> and productivity in past oceans. *Nature* **341**, 516–518 (1989).
- 720 29. R. R. Bidigare, *et al.*, Consistent fractionation of <sup>13</sup>C in nature and in the laboratory: Growth-rate  
721 effects in some haptophyte algae. *Global Biogeochem. Cycles* **11**, 279–292 (1997).
- 722 30. M. H. O’Leary, Measurement of the isotope fractionation associated with diffusion of carbon dioxide  
723 in aqueous solution. *J. Phys. Chem.* **88**, 823–825 (1984).
- 724 31. J. A. Higgins, *et al.*, Atmospheric composition 1 million years ago from blue ice in the Allan Hills,  
725 Antarctica. *Proc Natl Acad Sci USA* **112**, 6887–6891 (2015).
- 726 32. J. P. Jasper, J. M. Hayes, A carbon isotope record of CO<sub>2</sub> levels during the late Quaternary. *Nature*  
727 **347**, 462–464 (1990).
- 728 33. M. Pagani, *et al.*, The role of carbon dioxide during the onset of Antarctic glaciation. *Science* **334**,  
729 1261–1264 (2011).

- 730 34. M. Schidlowski, A 3,800-million-year isotopic record of life from carbon in sedimentary rocks. *Nature*  
731 **333**, 313–318 (1988).
- 732 35. A. K. Garcia, *et al.*, System-level effects of CO<sub>2</sub> and RuBisCO concentration on carbon isotope  
733 fractionation. *BioRxiv* (2021) <https://doi.org/10.1101/2021.04.20.440233>.
- 734 36. M. Kędzior, *et al.*, Molecular foundations of Precambrian uniformitarianism. *BioRxiv* (2021)  
735 <https://doi.org/10.1101/2021.05.31.446354>.
- 736 37. B. Kacar, V. Hanson-Smith, Z. R. Adam, N. Boekelheide, Constraining the timing of the Great  
737 Oxidation Event within the Rubisco phylogenetic tree. *Geobiology* **15**, 628–640 (2017).
- 738 38. P. M. Shih, *et al.*, Biochemical characterization of predicted Precambrian RuBisCO. *Nat. Commun.*  
739 **7**, 10382 (2016).
- 740 39. M. Kędzior, *et al.*, Resurrected Rubisco suggests uniform carbon isotope signatures over geologic  
741 time. *Cell Rep.* **39**, 110726 (2022).
- 742 40. J. L. Collier, A. R. Grossman, Chlorosis induced by nutrient deprivation in *Synechococcus* sp. strain  
743 PCC 7942: not all bleaching is the same. *J. Bacteriol.* **174**, 4718–4726 (1992).
- 744 41. R. D. Guy, M. L. Fogel, J. A. Berry, Photosynthetic fractionation of the stable isotopes of oxygen  
745 and carbon. *Plant Physiol.* **101**, 37–47 (1993).
- 746 42. D. B. McNevin, M. R. Badger, H. J. Kane, G. D. Farquhar, Measurement of (carbon) kinetic isotope  
747 effect by Rayleigh fractionation using membrane inlet mass spectrometry for CO<sub>2</sub>-consuming  
748 reactions. *Funct. Plant Biol.* **33**, 1115 (2006).
- 749 43. K. M. Scott, J. Schwedock, D. P. Schrag, C. M. Cavanaugh, Influence of form IA RubisCO and  
750 environmental dissolved inorganic carbon on the delta<sup>13</sup>C of the clam-chemoautotroph symbiosis  
751 *Solemya velum*. *Environ. Microbiol.* **6**, 1210–1219 (2004).
- 752 44. P. J. Thomas, *et al.*, Isotope discrimination by form IC RubisCO from *Ralstonia eutropha* and  
753 *Rhodobacter sphaeroides*, metabolically versatile members of “Proteobacteria” from aquatic and  
754 soil habitats. *Environ. Microbiol.* (2018) <https://doi.org/10.1111/1462-2920.14423>.
- 755 45. G. G. B. Tcherkez, G. D. Farquhar, T. J. Andrews, Despite slow catalysis and confused substrate  
756 specificity, all ribulose biphosphate carboxylases may be nearly perfectly optimized. *Proc Natl*  
757 *Acad Sci USA* **103**, 7246–7251 (2006).
- 758 46. T. Ogawa, A. Kaplan, Inorganic carbon acquisition systems in cyanobacteria. *Photosyn. Res.* **77**,  
759 105–115 (2003).
- 760 47. M. Volokita, D. Zenvirth, A. Kaplan, L. Reinhold, Nature of the Inorganic Carbon Species Actively  
761 Taken Up by the Cyanobacterium *Anabaena variabilis*. *Plant Physiol.* **76**, 599–602 (1984).
- 762 48. G. D. Price, S. Maeda, T. Omata, M. R. Badger, Modes of active inorganic carbon uptake in the  
763 cyanobacterium, *Synechococcus* sp. PCC7942. *Functional Plant Biol.* **29**, 131 (2002).
- 764 49. S. Maeda, M. R. Badger, G. D. Price, Novel gene products associated with NdhD3/D4-containing  
765 NDH-1 complexes are involved in photosynthetic CO<sub>2</sub> hydration in the cyanobacterium,  
766 *Synechococcus* sp. PCC7942. *Mol. Microbiol.* **43**, 425–435 (2002).
- 767 50. B. Klughammer, D. Sültemeyer, M. R. Badger, G. D. Price, The involvement of NAD(P)H  
768 dehydrogenase subunits, NdhD3 and NdhF3, in high-affinity CO<sub>2</sub> uptake in *Synechococcus* sp.  
769 PCC7002 gives evidence for multiple NDH-1 complexes with specific roles in cyanobacteria. *Mol.*  
770 *Microbiol.* **32**, 1305–1315 (1999).
- 771 51. J. M. Schuller, *et al.*, Redox-coupled proton pumping drives carbon concentration in the

- 772        photosynthetic complex I. *Nat. Commun.* **11**, 494 (2020).
- 773    52. J. J. Desmarais, *et al.*, DABs are inorganic carbon pumps found throughout prokaryotic phyla. *Nat.*  
774        *Microbiol.* **4**, 2204–2215 (2019).
- 775    53. Z. Sade, I. Halevy, New constraints on kinetic isotope effects during CO<sub>2</sub>(aq) hydration and  
776        hydroxylation: Revisiting theoretical and experimental data. *Geochim. Cosmochim. Acta* **214**, 246–  
777        265 (2017).
- 778    54. R. E. Zeebe, D. Wolf-Gladrow, *CO<sub>2</sub> in seawater: Equilibrium, kinetics, isotopes* (Elsevier, 2001).
- 779    55. I. D. Clark, B. Lauriol, Kinetic enrichment of stable isotopes in cryogenic calcites. *Chem. Geol.* **102**,  
780        217–228 (1992).
- 781    56. W. Guo, “CARBONATE CLUMPED ISOTOPE THERMOMETRY: APPLICATION TO  
782        CARBONATEOUS CHONDRITES & EFFECTS OF KINETIC ISOTOPE  
783        FRACTIONATION,” California Institute of Technology. (2009).
- 784    57. R. E. Zeebe, Kinetic fractionation of carbon and oxygen isotopes during hydration of carbon  
785        dioxide. *Geochim. Cosmochim. Acta* **139**, 540–552 (2014).
- 786    58. J. D. Boettger, J. D. Kubicki, Equilibrium and kinetic isotopic fractionation in the CO<sub>2</sub> hydration and  
787        hydroxylation reactions: Analysis of the role of hydrogen-bonding via quantum mechanical  
788        calculations. *Geochim. Cosmochim. Acta* **292**, 37–63 (2021).
- 789    59. D. Tchernov, *et al.*, Passive entry of CO<sub>2</sub> and its energy-dependent intracellular conversion to  
790        HCO<sub>3</sub><sup>-</sup> in cyanobacteria are driven by a photosystem I-generated ΔμH<sup>+</sup>. *J. Biol. Chem.* **276**,  
791        23450–23455 (2001).
- 792    60. G. S. Espie, A. G. Miller, D. T. Canvin, High affinity transport of CO<sub>2</sub> in the cyanobacterium  
793        *Synechococcus* UTEX 625. *Plant Physiol.* **97**, 943–953 (1991).
- 794    61. A. Kaplan, L. Reinhold, CO<sub>2</sub> concentrating mechanisms in photosynthetic microorganisms. *Annu.*  
795        *Rev. Plant Physiol. Plant Mol. Biol.* **50**, 539–570 (1999).
- 796    62. M. Eichner, S. Thoms, S. A. Kranz, B. Rost, Cellular inorganic carbon fluxes in *Trichodesmium*: a  
797        combined approach using measurements and modelling. *J. Exp. Bot.* **66**, 749–759 (2015).
- 798    63. J. Erez, A. Bouevitch, A. Kaplan, Carbon isotope fractionation by photosynthetic aquatic  
799        microorganisms: experiments with *Synechococcus* PCC7942, and a simple carbon flux model. *Can.*  
800        *J. Bot.* **76**, 1109–1118 (1998).
- 801    64. N. Adir, M. Dines, M. Klartag, A. McGregor, M. Melamed-Frank, “Assembly and disassembly of  
802        phycobilisomes” in *Complex Intracellular Structures in Prokaryotes*, Microbiology Monographs., J.  
803        M. Shively, Ed. (Springer Berlin Heidelberg, 2006), pp. 47–77.
- 804    65. H. Wang, *et al.*, Rubisco condensate formation by CcmM in β-carboxysome biogenesis. *Nature*  
805        **566**, 131–135 (2019).
- 806    66. N. Battchikova, M. Eisenhut, E.-M. Aro, Cyanobacterial NDH-1 complexes: novel insights and  
807        remaining puzzles. *Biochim. Biophys. Acta* **1807**, 935–944 (2011).
- 808    67. C. Iñiguez, *et al.*, Evolutionary trends in RuBisCO kinetics and their co-evolution with CO<sub>2</sub>  
809        concentrating mechanisms. *Plant J.* **101**, 897–918 (2020).
- 810    68. D. C. Catling, K. J. Zahnle, The Archean atmosphere. *Sci. Adv.* **6**, eaax1420 (2020).
- 811    69. P. W. Crockford, *et al.*, Triple oxygen isotope evidence for limited mid-Proterozoic primary  
812        productivity. *Nature* **559**, 613–616 (2018).

- 813 70. C. Fei, A. T. Wilson, N. M. Mangan, N. S. Wingreen, M. C. Jonikas, Modelling the pyrenoid-based  
814 CO<sub>2</sub>-concentrating mechanism provides insights into its operating principles and a roadmap for its  
815 engineering into crops. *Nat. Plants* **8**, 583–595 (2022).
- 816 71. S. S. Golden, L. A. Sherman, Optimal conditions for genetic transformation of the cyanobacterium  
817 *Anacystis nidulans* R2. *J. Bacteriol.* **158**, 36–42 (1984).
- 818 72. S. Saschenbrecker, *et al.*, Structure and function of RbcX, an assembly chaperone for  
819 hexadecameric Rubisco. *Cell* **129**, 1189–1200 (2007).
- 820 73. D. M. Banda, *et al.*, Novel bacterial clade reveals origin of form I Rubisco. *Nat. Plants* **6**, 1158–1166  
821 (2020).
