1 **Title: Carbon isotope fractionation by an ancestral rubisco**  
2 **suggests biological proxies for CO<sub>2</sub> through geologic time should**  
3 **be re-evaluated**

4  
5 **Authors:** Renée Z. Wang<sup>\*1</sup>, Robert J. Nichols<sup>2</sup>, Albert K. Liu<sup>3,4</sup>, Avi I. Flamholz<sup>5</sup>, **Juliana**  
6 **Artier<sup>6</sup>**, Doug M. Banda<sup>7</sup>, David F. Savage<sup>2,8</sup>, John M. Eiler<sup>1</sup>, Patrick M. Shih<sup>3,6</sup>,  
7 Woodward W. Fischer<sup>1</sup>

8  
9 **Author affiliations:** (1) California Institute of Technology, Division of Geological &  
10 Planetary Sciences. (2) University of California, Berkeley, Department of Molecular and  
11 Cell Biology. (3) Lawrence Berkeley National Lab, Joint Bioenergy Institute. (4)  
12 University of California, Davis, Biochemistry, Molecular, Cellular and Developmental  
13 Biology Graduate Group. (5) California Institute of Technology, Division of Biology and  
14 Biological Engineering. (6) University of California, Berkeley, Department of Plant and  
15 Microbial Biology. (7) University of California, Davis, Department of Plant Biology. (8)  
16 Howard Hughes Medical Institute, University of California, Berkeley, California 94720.

17  
18 **Corresponding author:** \*Renée Z. Wang  
19 **Email:** [rzwang@caltech.edu](mailto:rzwang@caltech.edu)

20  
21 **ORCID:**

22 R.Z.W.: 0000-0003-3994-3244

23 R.J.N.: 0000-0002-8476-0554

24 A.K.L.: 0000-0001-9500-0449

25 A.I.F.: 0000-0002-9278-5479

26 D.F.S.: 0000-0003-0042-2257

27 **J.A.: 0000-0001-5519-6627**

28  
29 **Competing Interest Statement:** Authors have no competing interests.

30  
31 **Classification:** Major: Physical Sciences. Minor: Earth, Atmospheric, and Planetary  
32 Sciences.

33  
34 **Keywords:** Evolution, Carbon Isotopes, Rubisco, Cyanobacteria, Precambrian  
35

## 36 **Abstract**

37 *247 words*

38

39 The history of Earth's carbon cycle reflects trends in atmospheric composition  
40 convolved with the evolution of photosynthesis. Fortunately, key parts of the carbon  
41 cycle have been recorded in the carbon isotope ratios of sedimentary rocks. The  
42 dominant model used to interpret this record as a proxy for ancient atmospheric CO<sub>2</sub> is  
43 based on carbon isotope fractionations of modern photoautotrophs, and longstanding  
44 questions remain about how their evolution might have impacted the record. We tested  
45 the intersection of environment and evolution by measuring both biomass ( $\epsilon_p$ ) and  
46 enzymatic ( $\epsilon_{\text{Rubisco}}$ ) carbon isotope fractionations of a cyanobacterial strain  
47 (*Synechococcus elongatus* PCC 7942) solely expressing a putative ancestral Form 1B  
48 rubisco dating to  $\gg 1$  Ga. This strain, nicknamed ANC, grows in ambient pCO<sub>2</sub> and  
49 displays larger  $\epsilon_p$  values than WT, despite having a much smaller  $\epsilon_{\text{Rubisco}}$  ( $17.23 \pm$   
50  $0.61\%$  vs.  $25.18 \pm 0.31\%$  respectively). Measuring both enzymatic and biomass  
51 fractionation revealed a surprising result—ANC  $\epsilon_p$  exceeded ANC  $\epsilon_{\text{Rubisco}}$  in all  
52 conditions tested, contradicting prevailing models of cyanobacterial carbon isotope  
53 fractionation. However, these models were corrected by accounting for cyanobacterial  
54 physiology, notably the CO<sub>2</sub> concentrating mechanism (CCM). Our model suggested  
55 that additional fractionating processes like powered inorganic carbon uptake systems  
56 contribute to  $\epsilon_p$ , and this effect is exacerbated in ANC. Understanding the evolution of  
57 rubisco and the CCM is therefore critical for interpreting the carbon isotope record.  
58 Large fluctuations in that record may reflect the evolving efficiency of carbon fixing  
59 metabolisms in addition to changes in atmospheric CO<sub>2</sub>.

## 60 **Significance Statement**

61 *116 words*

62

63 Earth scientists rely on chemical fossils like the carbon isotope record to derive ancient  
64 atmospheric CO<sub>2</sub> concentrations, but interpretation of this record is calibrated using  
65 modern organisms. We tested this assumption by measuring the carbon isotope  
66 fractionation of a reconstructed ancestral rubisco enzyme (>1 billion years old) *in vivo*  
67 and *in vitro*. Our results contradicted prevailing models of carbon flow in Cyanobacteria,  
68 but our data could be rationalized if light-driven uptake of CO<sub>2</sub> is taken into account. Our  
69 study showed that the carbon isotope record tracks both the evolution of photosynthesis  
70 physiology as well as changes in atmospheric CO<sub>2</sub>, highlighting the value of considering

71 both evolution and physiology for comparative biological approaches to understanding  
72 Earth's history.

## 73 Main Text

### 74 Introduction

75 Photoautotrophs have evolved over geologic time to harness energy from the sun in  
76 order to 'fix' external, inorganic carbon ( $C_i$ ) into reduced, organic carbon ( $C_o$ ), thereby creating  
77 biomass for growth. Today, and likely for much of Earth's history (1), the most widespread  
78 strategy for carbon fixation is the Calvin-Benson-Bassham (CBB) Cycle, where the key carbon  
79 fixation step is catalyzed by ribulose-1,5-bisphosphate (RuBP) carboxylase/oxygenase (rubisco)  
80 (2, 3). But rubisco's central role in the CBB cycle and oxygenic photosynthesis poses a  
81 conundrum because it is usually considered to be a non-specific and slow enzyme. The first  
82 issue concerns rubisco's dual carboxylase and oxygenase activities: the RuBP intermediate  
83 (enediolate) is susceptible to both  $O_2$  and  $CO_2$  attack (4). Consequently, instead of fixing a  $CO_2$   
84 molecule during photosynthesis, rubisco can instead assimilate  $O_2$  to yield 2-phosphoglycolate  
85 (2-PG), which is not part of the CBB cycle and therefore must be salvaged through  
86 photorespiratory pathways that consume ATP, reducing power, and carbon (5). The second  
87 issue concerns rubisco's maximum carboxylation rate ( $V_c$ ), which is  $\approx 7$ -10 times slower than  
88 other central metabolic enzymes (6), and displays very limited variation across large  
89 phylogenetic distances (7).

90 Both issues—its dual carboxylase / oxygenase activity and limited maximum  
91 carboxylation rate—are typically rationalized by considering its evolutionary history in the  
92 context of long-term changes in environmental  $CO_2$  and  $O_2$  concentrations. Rubisco is thought  
93 to have evolved at a time when there was trace  $O_2$  and much higher  $CO_2$  concentrations in the  
94 atmosphere, in contrast to the modern atmosphere where  $O_2$  is roughly 20% while  $CO_2$  is only  
95 about 0.04% by partial pressure (1). In addition, rubisco is thought to have been the primary  
96 carboxylating enzyme of global photosynthesis since the Great Oxygenation Event, and  
97 potentially far prior (1).

98 Likely in response to these changing environmental concentrations, many aquatic  
99 photoautotrophs have evolved  $CO_2$  concentrating mechanisms (CCMs) that concentrate  $CO_2$   
100 around rubisco in order to enhance carboxylation and suppress oxygenation. Even with CCMs,  
101 the effective *in vivo* rates of extant rubiscos are estimated to be much lower ( $\approx 1\%$  for terrestrial  
102 and  $\approx 15\%$  for marine rubiscos) than their maximal catalytic rates observed in lab at  $25^\circ C$ , likely  
103 due to rubisco not working at night and the lower temperature of marine environments (2).

104 However, all known Cyanobacteria today have CCMs, as do many bacterial  
105 chemolithoautotrophs, many aquatic algae, and some plants (8). The bacterial CCM has two  
106 main components: i)  $C_i$  pumps producing high cytosolic  $HCO_3^-$  concentrations, and ii) co-  
107 encapsulation of carbonic anhydrase (CA) and rubisco inside proteinaceous organelles known  
108 as carboxysomes (Figure 1A) (9–11). These powered  $C_i$  pumps include BCT1 (ATP-dependent

109 powered  $\text{HCO}_3^-$  transporter), SbtA (Na $^-$ / $\text{HCO}_3^-$  symporters), BicA (Na $^-$ -dependent  $\text{HCO}_3^-$   
 110 transporter), NDH-1MS and NDH-1MS' (NADPH-dependent powered  $\text{CO}_2$  uptake; see (12) for  
 111 review). There are competing arguments in the literature for when the CCM evolved, ranging  
 112 from the Proterozoic to the Phanerozoic Eon (8, 13). Therefore, for up to half of Earth's history,  
 113 bacterial rubiscos have functioned in concert with a system that pumps  $\text{C}_i$  into and around the  
 114 cell.

115 However, rationalization of rubisco's evolutionary history is highly dependent on our  
 116 understanding of past environments, e.g. atmospheric  $\text{CO}_2$  and  $\text{O}_2$  concentrations. For the vast  
 117 majority of Earth's history, we must rely on chemical fossils like the carbon isotope record for  
 118 this purpose. The carbon isotope record is composed of measurements of the relative ratios of  
 119  $^{13}\text{C}$  to  $^{12}\text{C}$  isotopes in C-bearing phases of sedimentary rocks over time. Contemporaneous  $\text{C}_i$   
 120 pools are preserved as carbonate salts (like limestones and dolomites), while contemporaneous  
 121 biomass and  $\text{C}_o$  pools are preserved in the organic-rich components (typically kerogen) of many  
 122 different lithologies and are measured as rock total organic carbon (TOC) (14). The difference in  
 123 C-isotope ratios between organic samples and an inorganic reference is typically reported using  
 124 delta notation ( $\delta^{13}\text{C}$ ) and expressed in per mil (‰, see Methods). Currently, carbon isotope data  
 125 has been assembled globally from myriad environments to cover  $\approx 3.8$  billion years (Ga) of  
 126 Earth's 4.5 Ga history; this data is viewed as a record of both inorganic and organic carbon  
 127 cycle processes over geologic time (15).  
 128

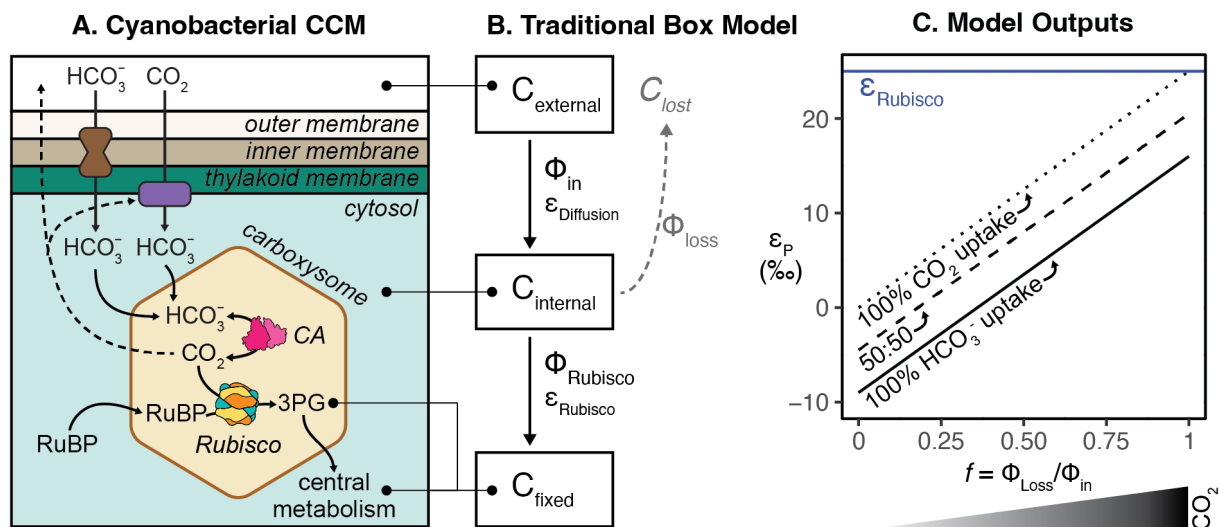

129  
 130 **Figure 1: Comparing the Cyanobacterial CO<sub>2</sub> Concentrating Mechanism (CCM) to the traditional**  
 131 **box model of photosynthetic C isotope discrimination.** A) Cyanobacterial CCMs rely on i) active  $\text{C}_i$   
 132 uptake into the cell, and ii) co-encapsulation of carbonic anhydrase (CA) and rubisco within the  
 133 carboxysome. Independent, powered transporters for  $\text{HCO}_3^-$  and  $\text{CO}_2$  are shown in brown and purple;  
 134 both work to increase cytosolic concentrations of  $\text{HCO}_3^-$  (see (12) for review). All CCM components work  
 135 to produce a high carboxysomal  $\text{CO}_2$  concentration that enhances  $\text{CO}_2$  fixation by rubisco and  
 136 suppresses oxygenation. Limited  $\text{CO}_2$  escapes from the carboxysome – some is scavenged by  $\text{CO}_2$   
 137 pumps while the rest leaves the cell. B) Architecture of the traditional box model based on (16–19); see  
 138 Supplemental for full discussion of this model. Boxes denote carbon pools of interest, and fluxes between  
 139 boxes are denoted by  $\Phi$ . Each flux has its own isotopic fractionation denoted by  $\epsilon$ ; no fractionation is

140 assumed for  $\Phi_{\text{loss}}$ . Model assumes an infinitely large external carbon pool, that carbon not fixed by  
141 rubisco ( $C_{\text{lost}}$ ) returns to this pool, and that fluxes are at steady state. Note that this architecture does not  
142 include a box for the carboxysome. C) Model solution for the traditional model is  $\epsilon_P = a^* \epsilon_{\text{equil}} + f^* \epsilon_{\text{Rubisco}}$ ,  
143 where where  $\epsilon_P$  is defined as the difference in  $\delta^{13}\text{C}$  of  $C_{\text{external}}$  and  $C_{\text{fixed}}$ ,  $f$  is defined as the fraction of  $C_i$   
144 lost ( $\Phi_{\text{loss}}/\Phi_{\text{in}}$ ), and  $a$  is the fractional contribution of  $\text{HCO}_3^-$  to total  $C_i$  uptake. When  $a = 0$ , all  $C_i$  uptake is  
145 as  $\text{CO}_2$  (dotted line); when  $a = 1$ , all  $C_i$  uptake is as  $\text{HCO}_3^-$  (solid line). This model is presented in (20),  
146 which is a generalization of (21) that accounts for the fact that  $C_i$  uptake ( $\Phi_{\text{in}}$  in Panel B) ranges in  
147 composition between  $\text{CO}_2$  and  $\text{HCO}_3^-$  based on which  $C_i$  uptake system is used. Values of  $\epsilon_{\text{Rubisco}} = 25\%$   
148 and  $\epsilon_{\text{equil}} = -9\%$  were used for this illustration (22). Model outputs indicate that at high external  $\text{CO}_2$   
149 concentrations (dark wedge under graph) there is excess  $\text{CO}_2$  that rubisco cannot use, causing net  $C_i$   
150 leakage (larger  $f$  values) from the cell.

151  
152 The carbon isotope record is particularly important for constraining ancient atmospheric  
153  $\text{pCO}_2$  (23, 24) because direct observations of the past atmosphere from ice cores only extends  
154 back  $\approx 1$  million years (25). One notable feature of the record from  $\approx 3.8$  Ga to the present is that  
155 the  $\delta^{13}\text{C}$  of  $C_o$  is depleted in  $^{13}\text{C}$  by  $\approx 25\%$  compared to  $C_i$  (14, 15, 26), and this offset roughly  
156 matches the carbon isotopic fractionation of known carbon-fixing metabolisms and enzymes in  
157 the modern. (Note that the convention for reporting  $\epsilon$  in this field is the opposite of other  
158 geochemistry fields – here, a negative value indicates a relative  $^{13}\text{C}$  enrichment, in contrast to  
159 other fields where negative values mean  $^{13}\text{C}$  depletion.) Rubisco displays a kinetic isotope effect  
160 (KIE) where it preferentially fixes  $^{12}\text{CO}_2$  over  $^{13}\text{CO}_2$  due in part to the  $V_C$  being slightly faster for  
161  $^{12}\text{CO}_2$  than  $^{13}\text{CO}_2$  (27), which causes the reaction product, 3-phosphoglycerate (3-PG), to be  
162 relatively depleted in  $^{13}\text{C}$  by several percent (tens of  $\%$ ) relative to the isotopic composition of  
163 the initial  $\text{CO}_2$  substrate. The difference in  $\delta^{13}\text{C}$  of the  $\text{CO}_2$  substrate and the 3-PG product is  
164 typically reported as  $\epsilon_{\text{Rubisco}}$  and varies between 18-30 $\%$  for several extant rubiscos (26, 28),  
165 with the exception of the coccolithophore *Emiliania huxleyi* with  $\epsilon_{\text{Rubisco}} \approx 11\%$  (29). Because all  
166 biomass is synthesized from 3-PG in autotrophs utilizing the CBB cycle, biomass is depleted in  
167  $^{13}\text{C}$  compared to external  $C_i$  pools and the magnitude of this difference is called  $\epsilon_P$ . There is an  
168 additional fractionation factor associated with the preservation of biomass and  $C_i$  as rocks, so  
169 the magnitude of fractionation between  $C_i$  and  $C_o$  pools measured from the rock record is  
170 termed  $\epsilon_{\text{TOC}}$  and varies slightly from  $\epsilon_P$  (30). Therefore, if one can accurately derive  $\epsilon_P$  from the  
171 rock record ( $\epsilon_{\text{TOC}}$ ) and pair it with some model relating  $\epsilon_P$  to  $\text{pCO}_2$ , one could learn about both  
172 the evolution of photosynthetic physiology and abiotic changes in the carbon cycle over geologic  
173 time.

174 The dominant model used today for this purpose (“C Isotope Record Model,” Figure S7)  
175 is:

$$176 \quad \epsilon_p = \epsilon_f - \frac{b}{[\text{CO}_2(\text{aq})]} \quad (\text{Equation 1})$$

177  $\epsilon_f$  is the maximum possible isotopic fractionation of photosynthetic carbon fixation and is  
178 typically set to  $\epsilon_{\text{Rubisco}}$ . The term  $b$  ( $\%$  kg  $\mu\text{M}^{-1}$ ) is empirically fit from pure culture experiments of  
179 eukaryotic and bacterial algae, and encompasses all physiologic effects that may affect isotopic  
180 fractionation like the CCM, growth rate, cell size and geometry, membrane permeability, growth  
181 media composition (e.g. pH, salinity, limiting nutrient), strain genetics and physiological state

182 (31–35).  $[CO_2(aq)]$  is the concentration of dissolved  $CO_2$  in solution around the cells, and in the  
183 limit of high  $[CO_2(aq)]$ , the term  $b/[CO_2(aq)]$  goes to zero and  $\epsilon_P = \epsilon_f$ , which is assumed to be  
184  $\epsilon_{Rubisco}$ . Therefore, the maximum value of  $\epsilon_P$  is  $\epsilon_{Rubisco}$ , and the term  $b$  sets how quickly  $\epsilon_P$   
185 approaches the limit of  $\epsilon_{Rubisco}$ .

186 The C Isotope Record model has such a limit because the laboratory studies of plants  
187 and algae that it is based on (“Traditional model,” Figure 1) shows such a limit. The traditional  
188 model was originally based on studies of carbon isotope fractionation in plants (dotted line in  
189 “Traditional model” in Figure 1C; all  $C_i$  uptake is as  $CO_2$  for plants) and was later adapted to  
190 eukaryotic and bacterial algae. The primary architecture of this model stems from a seminal  
191 study by Park and Epstein (18) who proposed a “two step model” to explain  $\epsilon_P$  of tomato plants  
192 grown in varied  $CO_2$  concentrations and light levels. In this model, carbon can be viewed as  
193 residing in one of three pools, or “boxes” (Figure 1B) -  $C_i$  outside the cell ( $C_{ext}$ ),  $C_i$  inside the cell  
194 ( $C_{internal}$ ), or  $C_o$  as biomass ( $C_{fixed}$ ). A “leakiness” term,  $f$ , is defined as the ratio of fluxes ( $\Phi$ ) of  $C_i$   
195 exiting or entering the plant, where all of the  $C_i$  that entered the cell is lost when  $f=1$ . In this  
196 simplified model,  $\epsilon_p$  is determined by the isotopic effect of two distinct steps: i) the diffusion of  
197  $CO_2$  into the plant ( $\epsilon_{Diffusion}$ ;  $<1\%$  across a diaphragm cell in water at  $25^\circ C$  (36)); and ii) the  
198 carbon fixation step catalyzed by rubisco ( $\epsilon_{Rubisco}$ ;  $\approx 18-30\%$ ). Notably, Park and Epstein  
199 proposed that the isotopic fractionations of these two steps are not additive *in vivo* (i.e.  $\epsilon_p \neq$   
200  $\epsilon_{Diffusion} + \epsilon_{Rubisco}$ ) but instead reflects the process by which photosynthesis is limited, either  
201 diffusion of  $CO_2$  into the cell ( $\epsilon_p = \epsilon_{Diffusion}$ ) or  $CO_2$  fixation by rubisco ( $\epsilon_p = \epsilon_{Rubisco}$ ) (18).

202 This physiological interpretation results from the model solution, which is usually solved  
203 by assuming steady state and results in a linear relationship between  $\epsilon_p$  and  $f$  where the  
204 minimum and maximum  $\epsilon_p$  values are  $\epsilon_{Diffusion}$  and  $\epsilon_{Rubisco}$  respectively (Figure 1C). This allows  
205 experimentally measured values of  $\epsilon_p$  to then be used to solve for  $CO_2$  leakage ( $f$ , Figure 1C).  
206 Therefore, the corresponding physiological interpretations at the minimum and maximum model  
207 limits are when  $\epsilon_p \approx \epsilon_{Diffusion}$ , nearly all carbon entering the cell is used and with this mass  
208 balance constraint rubisco’s  $^{12}C$  preference is not “expressed”; conversely, when  $\epsilon_p \approx \epsilon_{Rubisco}$ ,  
209 very little of the carbon entering the cell is fixed ( $f \approx 1$ , i.e. nearly all of the carbon leaks from the  
210 cell) and rubisco can “choose” between  $^{12}C$  and  $^{13}C$  substrates so that rubisco’s KIE is fully  
211 expressed. Farquhar et al. (19) later derived a relationship between  $\epsilon_p$  and the ratio of external  
212 vs. intracellular  $CO_2$  partial pressures, allowing  $CO_2$  concentrations at the site of rubisco to be  
213 estimated from  $\epsilon_p$ . Therefore, given the assumption that  $C_i$  is taken up passively, it is possible to  
214 derive an increasing relationship between  $C_{ext}$  and  $\epsilon_P$  from this model, where large  $\epsilon_P$  suggests  
215 that high external  $CO_2$  concentrations are creating excess  $CO_2$  at rubisco and ultimately causing  
216 more  $CO_2$  to leak out of the cell than can be fixed (see Supplemental and (17)).

217 This model was later adapted to algae to account for CCMs – mainly active uptake of  $C_i$   
218 as  $HCO_3^-$  and/or  $CO_2$  – and physiological parameters including growth rate and cell geometry  
219 (21, 31, 32, 37, 38). These studies grew eukaryotic and bacterial algae in a range of  $pCO_2$  and  
220 culturing conditions to test if the linear relationship between  $\epsilon_p$  and  $[CO_2]$  observed in plants still  
221 holds. Interestingly, cyanobacterial  $\epsilon_p$  was found to be roughly constant independent of  
222 environmental  $pCO_2$  and growth rate (31). In addition, because measured cyanobacterial  $\epsilon_p$



223 values were less than known cyanobacterial  $\epsilon_{\text{Rubisco}}$  values, additional isotopic fractionation  
224 factors were not needed to explain  $\epsilon_p$ , even though some active  $C_i$  transport processes, which  
225 may fractionate carbon isotopes, were known in Cyanobacteria at the time (39–41). Therefore,  
226 though different versions of this model exist, all variations essentially modified the plant model  
227 by shifting the y-intercept of Fig. 1C to account for uptake of  $\text{HCO}_3^-$  in addition to  $\text{CO}_2$ . If  $C_i$   
228 entering the cell is primarily  $\text{CO}_2$ , the model effectively represents plants (dotted line in Fig. 1C).  
229 If  $C_i$  entering the cell is primarily  $\text{HCO}_3^-$  through active uptake, as in many algae, all values are  
230 shifted to lower  $\epsilon_p$  values (solid line in Fig. 1C) because of the equilibrium isotopic effect ( $\epsilon_{\text{equil}}$ )  
231 between  $\text{CO}_2$  and  $\text{HCO}_3^-$  ( $\approx -9\text{‰}$  (22)). In Figure 1C, we plot the traditional model as derived in  
232 Eichner et al. (20), which is an adaptation of (21) :

$$\epsilon_p = f * \epsilon_{\text{Rubisco}} + a * \epsilon_{\text{equil}} \text{ (Equation 2)}$$

233  
234 Here  $\epsilon_{\text{equil}}$  is the equilibrium isotope effect, and  $a$  is the fraction of  $C_i$  entering the cell as  
235  $\text{CO}_2$  ( $a=0$ ) or  $\text{HCO}_3^-$  ( $a=1$ ); the diffusion isotope effect ( $\epsilon_{\text{Diffusion}}$ ) is considered negligible. See  
236 Supplementary Information for further discussion of the “traditional” model.

237 Overall, current models relating  $p\text{CO}_2$  and autotrophic carbon isotope fractionation have  
238 a limit where  $\epsilon_p$  cannot exceed  $\epsilon_{\text{Rubisco}}$  (Figure 1C). Yet, the largest  $\epsilon_p$  values observed in the  
239 Archaean Eon exceed 30‰ (14, 15) and also exceed all current measurements of  $\epsilon_{\text{Rubisco}}$  (for  
240 recent compilation see (26)). In addition, recent studies in dinoflagellates have shown that  $\epsilon_p$   
241 can regularly exceed  $\epsilon_{\text{Rubisco}}$  under certain growth conditions (for review see (28)), and detailed  
242 studies of Cyanobacteria imply that leakage estimates derived from  $\epsilon_p$  are not physiologically  
243 possible (20). These studies have therefore motivated updated models of carbon isotope  
244 fractionation in algae that account for the isotopic fractionations associated with different  $C_i$   
245 uptake mechanisms (20, 28).

246 In addition to taking modern physiology into account, it is also important to understand  
247 how the evolution of rubisco and the CCM may have affected the carbon isotope composition of  
248 biomass and therefore  $\delta^{13}\text{C}$  values of  $C_o$  preserved in the rock record. Recent studies have  
249 addressed this issue directly by testing model organisms that may better resemble an ancestral  
250 counterpart, including a cyanobacterial strain lacking a CCM (42), a cyanobacterial strain that  
251 overexpresses rubisco (43), and a cyanobacterial strain expressing an inferred ancestral  
252 rubisco dating from  $\approx 1\text{-}3$  Ga (44, 45).

253 Here, we measured the  $\epsilon_p$  of a control strain of *Synechococcus elongatus* PCC 7942  
254 expressing the wild-type rubisco (NS2-KanR, referred to as ‘WT’, see Methods), as well as a  
255 strain, ‘ANC’, engineered to express an inferred ancestral Form 1B enzyme (dating to  $>1$  Ga) as  
256 its sole rubisco (46) in varied  $\text{CO}_2$  and light conditions. This putative ancestral rubisco was  
257 previously purified and its kinetics were characterized *in vitro*. Its sequence was then inserted  
258 into the genome of a modern cyanobacterium, though the genome of the strain in that study  
259 contained both extant and ancestral rubisco sequences (46). Here we study a strain where the  
260 extant sequence has been fully deleted and replaced with the reconstructed ancestral  
261 sequence. In addition, we measured  $\epsilon_{\text{Rubisco}}$  of the present-day and ancestral rubiscos *in vitro*.  
262 We observed that: i) biomass  $\epsilon_p$  is greater for ANC than for its WT counterpart for all conditions  
263 tested, even though ANC  $\epsilon_{\text{Rubisco}}$  ( $17.23 \pm 0.61\text{‰}$ ) is considerably less than WT  $\epsilon_{\text{Rubisco}}$  ( $25.18 \pm$   
264  $0.31\text{‰}$ ); ii) ANC  $\epsilon_p$  exceeds  $\epsilon_{\text{Rubisco}}$  in all tested conditions even though the traditional model sets  
265 the maximum possible  $\epsilon_p = \epsilon_{\text{Rubisco}}$ ; iii) ANC  $\epsilon_p$  increases with light levels while WT  $\epsilon_p$  increases

266 with CO<sub>2</sub>; iv) ANC displays a growth defect at ambient pCO<sub>2</sub> that is rescued at high pCO<sub>2</sub>; and  
267 v) ANC growth is severely inhibited in high light. Consistent with recent studies of eukaryotic  
268 algae (20, 28), ANC  $\epsilon_p$  exceeding  $\epsilon_{\text{Rubisco}}$  implies that the traditional box model is incomplete and  
269 additional isotopic fractionations are needed. In addition, modulation of  $\epsilon_p$  with light suggests  
270 that aspects of cyanobacterial physiology beyond the CBB cycle must be taken into account to  
271 explain how  $\epsilon_p$  can vary independently of CO<sub>2</sub>. We posit additional factors related to C<sub>i</sub> uptake  
272 that might explain fractionation measurements that deviate from box model predictions in both  
273 extant and ancient organisms.

## 274 Results & Discussion

### 275 **Ancestral rubisco enzyme fractionates less than WT rubisco enzyme**

276 We measured the carbon isotope fractionations of WT and ANC rubiscos *in vitro* using  
277 the substrate depletion method ((47–50); see Methods). The kinetics of this putative ancestral  
278 rubisco were previously characterized *in vitro* and are summarized in Table 1 (46). Previous  
279 work on rubisco isotope discrimination predicted that  $\epsilon_{\text{Rubisco}}$  should correlate positively with  
280 specificity ( $S_{\text{C/O}}$ ), a unitless measure of the relative preference for CO<sub>2</sub> over O<sub>2</sub> (51). We  
281 therefore expected ANC and WT  $\epsilon_{\text{Rubisco}}$  values to be the same within uncertainty because of  
282 their similar  $S_{\text{C/O}}$  values, but found that ANC  $\epsilon_{\text{Rubisco}}$  ( $17.23 \pm 0.61\text{‰}$ ) was about 8‰ less than  
283 WT  $\epsilon_{\text{Rubisco}}$  ( $25.18 \pm 0.31\text{‰}$ , Table 1).  
284

| Rubisco              | $\epsilon_{\text{Rubisco}}$ (‰) | $V_c$ (s <sup>-1</sup> ) | $K_c^{\text{Air}}$ (μM) | $V_c/K_c^{\text{Air}}$<br>(s <sup>-1</sup> mM <sup>-1</sup> ) | $S_{\text{C/O}}$ |
|----------------------|---------------------------------|--------------------------|-------------------------|---------------------------------------------------------------|------------------|
| Ancestral<br>Form 1B | $17.23 \pm 0.61$                | $4.72 \pm 0.14$          | 168.7                   | 28                                                            | $49.6 \pm 1.8$   |
| Modern<br>Form 1B    | $25.18 \pm 0.31^*$              | $9.78 \pm 0.48^*$        | 184.1*                  | 53.1*                                                         | $50.3 \pm 2.0^*$ |

285  
286 **Table 1: Rubisco characteristics.** Starred values (\*) for the modern Form 1B were measured in rubiscos  
287 purified from *Synechococcus* sp. PCC 6301, which has the same small and large subunit (*RbcS*, *RbcL*)  
288 sequences as our working WT strain, *Synechococcus* sp. PCC 7942 (46). Kinetic isotope effect ( $\epsilon_{\text{Rubisco}}$ ,  
289 avg.  $\pm$  s.e.) was measured in this study using the substrate depletion method (47–50). Carboxylation  
290 turnover rate under substrate-saturated conditions ( $V_c$ ); Michaelis constant for CO<sub>2</sub> in ambient levels of  
291 O<sub>2</sub> ( $K_c^{\text{Air}}$ ); the catalytic efficiency towards CO<sub>2</sub> in ambient air ( $V_c/K_c^{\text{Air}}$ ); and specificity, a unitless measure  
292 of the relative preference for CO<sub>2</sub> over O<sub>2</sub>; ( $S_{\text{C/O}}$ ) are from (46).

### 293 **The ANC strain fractionates more than WT**

294 Working in *S. elongatus* PCC 7942, we produced a mutant strain lacking the native Form  
295 1B rubisco and expressing instead an ancestral Form 1B rubisco produced by computational  
296 ancestral sequence reconstruction (46) as its sole rubisco enzyme. We then grew this strain,  
297 termed ANC, and a control strain, termed wild-type or 'WT' (see Methods), in a variety of light  
298 and CO<sub>2</sub> levels: i) A reference condition (ambient pCO<sub>2</sub> of 0.04% v/v, standard light flux (120  
299 μE)); ii) High CO<sub>2</sub> (5% pCO<sub>2</sub>, 120 μE); iii) High light (0.04% pCO<sub>2</sub>, 500 μE). **The CO<sub>2</sub> gas at  
300 ambient and high CO<sub>2</sub> conditions had  $\delta^{13}\text{C}$  values of -12.46‰ and -36.84‰ respectively.**



301 Counter to expectations based on  $\epsilon_{\text{Rubisco}}$  (Table 1), ANC  $\epsilon_p$  was as large or larger than  
302 WT  $\epsilon_p$  in all conditions tested (Figure 2). This was consistent with recent results from a similar  
303 ancestral analog, where the ancestral analog's  $\epsilon_p$  values exceeded WT in ambient and elevated  
304  $\text{CO}_2$  levels (44). In this study, the highest ANC  $\epsilon_p$  values were observed for cultures grown in  
305 high light, where growth was comparatively slow (doubling time  $\approx 50$  hours, Figure 3 and Table  
306 S3). ANC  $\epsilon_p$  values were also modulated by light and  $\text{CO}_2$  differently than WT. Compared to the  
307 reference condition, WT  $\epsilon_p$  values were indifferent to high light and only increased in high  $\text{CO}_2$   
308 (Figure 2A). In contrast, ANC  $\epsilon_p$  values did not increase in high  $\text{CO}_2$  and only increased in high  
309 light (Figure 2B). This result contrasted with the ancestral analogue in (44) where  $\epsilon_p$  values  
310 increased by  $\approx 10\text{‰}$  at 2%  $\text{CO}_2$ .  
311

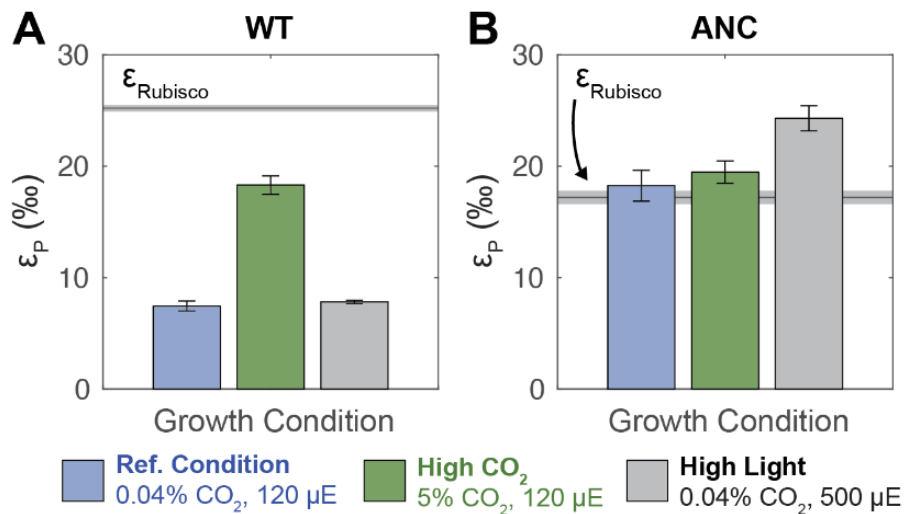

312  
313 **Figure 2: Whole cell carbon isotope fractionation by WT and ANC strains.**  $\epsilon_p$  (‰) values (avg.  $\pm$  s.e.)  
314 for A) WT and B) ANC strains across growth conditions.. For each strain, the maximum  $\epsilon_p$  possible based  
315 on the traditional model ( $\epsilon_p = \epsilon_{\text{Rubisco}}$ ) is shown as a gray line (avg.  $\pm$  s.e.). Most measured ANC  $\epsilon_p$  values  
316 exceed the theoretical limit ( $\epsilon_p > \epsilon_{\text{Rubisco}} + \text{s.e.}$ ), while WT  $\epsilon_p$  values do not ( $\epsilon_p < \epsilon_{\text{Rubisco}}$ ). WT  $\epsilon_p$  values  
317 increase in response to elevated  $\text{CO}_2$  concentrations, while ANC  $\epsilon_p$  values increase in response to  
318 elevated light flux. See Table S3 for full results.  
319

320 In addition, the traditional box model described above cannot accommodate  $\epsilon_p$  values in  
321 excess of  $\epsilon_{\text{Rubisco}}$  (Figure 1C). However, average ANC  $\epsilon_p$  values exceeded ANC  $\epsilon_{\text{Rubisco}}$  in all  
322 growth conditions (Figure 2), particularly under high light conditions where the largest difference  
323 was seen ( $\epsilon_p = 24.30 \pm 0.12\text{‰}$  vs  $\epsilon_{\text{Rubisco}} = 17.23 \pm 0.61\text{‰}$ ). The traditional box model also states  
324 that  $\epsilon_p$  values are solely modulated by changing external  $\text{pCO}_2$  concentrations, which cannot  
325 accommodate the ANC  $\epsilon_p$  observations.

## 326 Ancestral rubisco strain grows at ambient CO<sub>2</sub> concentrations

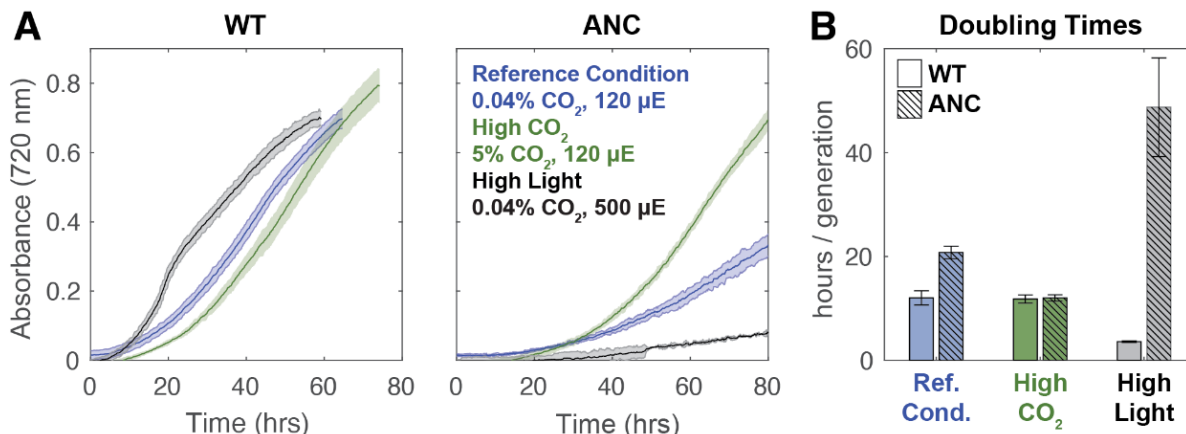

327  
328 **Figure 3: Growth curves for WT and ANC strains across experimental conditions.** A) Averaged  
329 growth curves shown for WT and ANC strains to 80 hours, colored by growth condition as indicated in  
330 figure. Data was smoothed with a rolling median (Methods); see full ANC growth curves in Supplemental  
331 Fig. S12. B) Average doubling times with standard deviations. See Supplemental for details of doubling  
332 time calculation. ANC displayed a growth defect relative to the WT at the reference condition, which was  
333 rescued by high CO<sub>2</sub>. ANC grew slowest in high light, while WT grew fastest in that condition.  
334

335 Remarkably, the ANC strain managed to grow in ambient pCO<sub>2</sub> and standard light  
336 conditions (Figure 3A), even though the ancestral rubisco has a V<sub>C</sub> roughly half that of WT  
337 (Table 1). This implies that its rubisco enzyme is properly encapsulated in the carboxysome,  
338 since it is well established that improper carboxysome formation greatly inhibits growth in  
339 ambient pCO<sub>2</sub> (52, 53). Mutant strains that are unable to form carboxysomes cannot grow in  
340 ambient air (53). Indeed, electron micrographs of WT and ANC cells grown in ambient CO<sub>2</sub> and  
341 light conditions (Methods) show multiple carboxysomes per cell in both strains (Figure 4 and  
342 Figure S13). Rubisco density can be seen within some of the carboxysomes (Figure 4C). In  
343 addition, the rubisco residues necessary for protein interactions mediating β-carboxysome  
344 encapsulation were recently identified (54). We aligned WT and ANC rubisco sequences and  
345 found that fourteen of the sixteen residues are conserved in the ancestral sequence (Tables S8-  
346 9, Figure S14). In addition, WT and ANC strains harvested during exponential growth in the  
347 reference condition exhibit similar photosystem stoichiometry, as indicated by absorbance  
348 spectra (Figure S15). Taken together, these data indicated that carboxysomes form in ANC and  
349 the ancestral rubisco is encapsulated within these structures. Further strengthening our  
350 inference that the ancestral sequence is compatible with β-carboxysome formation, a similar  
351 ancestral analogue was also found to grow in ambient air (44).  
352

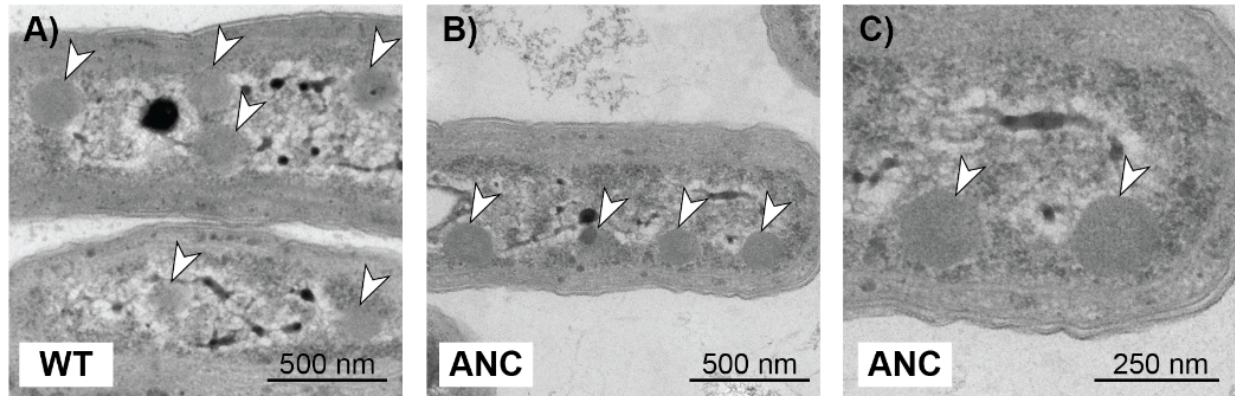

353  
354 **Figure 4: WT and ANC strains both produce carboxysomes at ambient pCO<sub>2</sub>.** Transmission electron  
355 micrographs of WT (A) and ANC (B,C) strains that were harvested during exponential growth in the  
356 reference condition (ambient pCO<sub>2</sub>, standard light flux). Both strains show multiple carboxysomes per cell,  
357 as indicated by white arrows, and carboxysomes exhibit the typical hexagonal shape (53). C) is the same  
358 image as in B) but magnified to show that rubisco density seen can be within the carboxysomes of ANC.  
359 The dark internal body in A) is likely a polyphosphate body (55). See Figure S13 for additional images.

360  
361 In addition, the difference in  $V_C$  between the ancestral and modern rubiscos was  
362 mirrored in the doubling times of WT and ANC strains (Figure 3B, Table S3), where ANC  
363 doubling times were roughly twice that of WT in the reference condition ( $20.8 \pm 1.2$  vs.  $12.0 \pm$   
364  $1.4$  hours respectively). In addition, the carboxylation efficiency in ambient air ( $V_C/K_C^{Air}$ ) for the  
365 ancestral Form 1B rubisco, which measures the enzyme's ability to carboxylate in conditions  
366 with low CO<sub>2</sub> and relatively high O<sub>2</sub>, is roughly half that of the modern Form 1B rubisco as well  
367 (Table 1). This suggested that ANC's growth was limited by its ability to fix CO<sub>2</sub> from ambient  
368 air. This growth defect was ameliorated by high pCO<sub>2</sub>, where doubling times for both strains  
369 were the same within uncertainty (WT  $11.8 \pm 0.8$  hours; ANC  $12.0 \pm 0.6$  hours), though we  
370 observed a longer lag phase for ANC. WT doubling times were the same within uncertainty for  
371 the reference and high CO<sub>2</sub> conditions ( $12.0 \pm 1.4$  vs.  $11.8 \pm 0.8$  hours respectively), **consistent**  
372 **with previous studies where increased pCO<sub>2</sub> did not affect growth rate (56).** In contrast, elevated  
373 CO<sub>2</sub> greatly accelerated the growth of ANC, reducing its doubling time from  $\approx 21$  to  $\approx 12$  hrs,  
374 supporting our inference that CO<sub>2</sub> availability is limiting the growth of ANC and implicating the  
375 CCM in its growth defect. Consistent with our results, a similar ancestral Form 1B analogue  
376 displayed total carboxylase activity roughly half that of the modern Form 1B (57).

377 We observed the greatest differences in doubling times between ANC and WT when the  
378 strains were grown at high light (Figure 3, Table S3). **In these conditions, WT cultures were a**  
379 **dark, blue-green color typical of healthy cyanobacterial cells while ANC cultures were yellow-**  
380 **green (Fig. S11), suggesting degradation of phycobilisomes via a known starvation pathway to**  
381 **reduce the cell's capacity for light harvesting and photochemical electron transport (58).** We  
382 therefore infer that ANC could not fix CO<sub>2</sub> at a rate matching its light harvesting capability, and  
383 hence invoked this regulatory pathway to decrease light harvesting capacity. WT, in contrast,  
384 grew rapidly in the high light condition.

## 385 Proposed influence of a light-powered, vectoral carbonic-anhydrase

386 As discussed above, recent studies in extant bacterial and eukaryotic algae have shown  
387 that  $\epsilon_P$  can regularly exceed  $\epsilon_{\text{Rubisco}}$  under certain growth conditions (for review see (28)),  
388 motivating updated models of carbon isotope fractionation in both eukaryotic and bacterial algae  
389 (20, 28, 59). These models suggested that  $\epsilon_P$  values could only be explained if another enzyme  
390 acting as a CA catalyzing an energy-coupled vectoral hydration of intracellular  $\text{CO}_2$  to  $\text{HCO}_3^-$   
391 was taken into account, since this reaction is calculated to have a large isotopic effect and  
392 would therefore allow  $\epsilon_P$  to exceed  $\epsilon_{\text{Rubisco}}$  (20, 28, 59). Though the cell does not “know” where  
393  $\text{CO}_2$  in the cytosol came from, these models primarily invoke such an enzyme for internal  $\text{C}_i$   
394 recycling, where  $\text{CO}_2$  lost from the carboxysome could be converted to  $\text{HCO}_3^-$  so that it could  
395 remain in the cell (20, 28, 59). However, energy-coupled CAs can also serve as  $\text{CO}_2$  uptake  
396 systems by converting extracellular  $\text{CO}_2$  that passively translocates the membrane to  
397 intracellular  $\text{HCO}_3^-$  (Figure 1A), which is advantageous in conditions (e.g. acidic pH) where  $\text{CO}_2$   
398 is the dominant form of extracellular  $\text{C}_i$  (10, 60, 61).

399 In general, Cyanobacteria have been shown to have two modes of active  $\text{C}_i$  uptake:  
400 uptake of hydrated  $\text{C}_i$  (predominantly  $\text{H}_2\text{CO}_3$  and  $\text{HCO}_3^-$ ) and uptake of  $\text{CO}_2$  (61). In order for the  
401 CCM to function, either mode would need to produce a high, non-equilibrium concentration of  
402  $\text{HCO}_3^-$  in the cytoplasm (8, 10). This is thought to be achieved by coupling CA to an energy  
403 source (e.g. light or an ion gradient) that drives the vectoral hydration of  $\text{CO}_2$  to  $\text{HCO}_3^-$  in the  
404 cytoplasm (62). There is now excellent data supporting this hypothesis in Cyanobacteria, where  
405 accessory proteins that bind to the NDH complex, the cyanobacterial homolog of the respiratory  
406 Complex I NADH-dehydrogenase, are known to mediate  $\text{CO}_2$  uptake specifically (63–65).  
407 Additionally, one of these accessory proteins, CupA/B, is reminiscent of a CA and contains a  
408 telltale zinc active site situated near a proton channel in a membrane subunit (66). The  
409 prevailing understanding of these data is, therefore, that these complexes couple inorganic  
410 carbon uptake to energy supplied by photochemical electron transport. Moreover, a similar  
411 protein complex has been described in proteobacterial chemoautotrophs, suggesting that  
412 energy-coupled  $\text{CO}_2$  hydration is widespread (60).

413 A vectoral CA would affect  $\epsilon_P$  for two reasons. First,  $\text{CO}_2$  and  $\text{HCO}_3^-$  are isotopically  
414 distinct. At equilibrium in standard conditions,  $\text{HCO}_3^-$  is  $\approx 8\%$  more enriched in  $^{13}\text{C}$  than  $\text{CO}_2$  (67,  
415 68). Therefore, if a cyanobacterium is predominantly taking up  $\text{CO}_2$ , the internal  $\text{C}_i$  pool from  
416 which biomass is formed would be isotopically lighter ( $^{13}\text{C}$ -depleted) than if  $\text{HCO}_3^-$  is the  
417 dominant source of  $\text{C}_i$ . Second, unidirectional  $\text{CO}_2$  hydration is expected to impart a substantial  
418 isotope effect, with calculated values ranging from  $\approx 19$  to  $32\%$  (67, 69–72). Therefore, there are  
419 two mechanistic reasons that  $\epsilon_P$  could exceed  $\epsilon_{\text{Rubisco}}$  in conditions where energized  $\text{CO}_2$  uptake  
420 and hydration is active. Indeed, a recent model of C-isotope fractionation in Cyanobacteria  
421 specifically invoked the NDH complex to rationalize  $\epsilon_P$  values that exceed  $\epsilon_{\text{Rubisco}}$  (20).

422 Because this energy-coupled  $\text{CO}_2$  uptake and hydration by the NDH complex is driven  
423 by light energy, e.g. via cyclic electron flow around photosystem I (66), and because the  
424 vectoral hydration of  $\text{CO}_2$  to  $\text{HCO}_3^-$  is thought to have a large carbon isotope fractionation, we  
425 hypothesized that  $\epsilon_P$  would increase with light intensity. Indeed, we observed the largest ANC  
426  $\epsilon_P$  values, far exceeding ANC  $\epsilon_{\text{Rubisco}}$ , in the high light condition and found that ANC  $\epsilon_P$  varies



427 primarily with light and not CO<sub>2</sub> (Figure 3). This observation is counter to the traditional model  
428 which proposes  $\epsilon_P$  as a direct correlate of external pCO<sub>2</sub> (16, 17). Furthermore, on short  
429 timescales ( $\approx$ minutes) cyanobacterial C<sub>i</sub> uptake can be modulated by light intensity alone, fully  
430 independent of external C<sub>i</sub> concentrations (73), and CO<sub>2</sub> uptake can occur in the absence of  
431 carbon fixation (74, 75). Based on these physiological and isotopic observations, our study also  
432 supports the hypothesis that a powered, vectoral CA like the NDH complex is likely active in  
433 Cyanobacteria, and is likely responsible for  $\epsilon_P > \epsilon_{\text{Rubisco}}$  in ANC.

#### 434 **Proposed model for carbon isotope fractionation in Cyanobacteria**

435 As discussed above, the traditional box model cannot produce  $\epsilon_P > \epsilon_{\text{Rubisco}}$  (Figure 1C). In  
436 this model, the C<sub>i</sub> leakage term ( $f$ ) is fit from measured  $\epsilon_P$  values and  $f = 1$  implies that all carbon  
437 uptake leaks out of the cell. Though the traditional box model can accommodate both CO<sub>2</sub> and  
438 HCO<sub>3</sub><sup>-</sup> uptake, which differ in their equilibrium isotopic composition, **even modeling 100% CO<sub>2</sub>**  
439 **uptake gave  $f > 1$  for ANC in all conditions (Figure 5A and S8).** Yet, ANC grew reproducibly in  
440 all conditions tested (Figure 3). We also encountered challenges using the traditional model to  
441 rationalize WT data: fitting the model gave  $f < 1$  in ambient pCO<sub>2</sub> conditions, but high CO<sub>2</sub>  
442 conditions yielded  $f > 1$  unless all C<sub>i</sub> uptake was assumed to be as HCO<sub>3</sub><sup>-</sup> (see Figure S8 and  
443 Supplemental Information for discussion). Therefore, to rationalize our results for both WT and  
444 ANC, we developed a box model that represents a small modification of the traditional model.

445 We modified the traditional model (Figure 1B,C) by adding an additional isotopic  
446 fractionation so that  $\epsilon_P$  can exceed  $\epsilon_{\text{Rubisco}}$ . As discussed above, we hypothesize that this  
447 additional fractionation is due to a vectoral, powered CA like the NDH complex. In the modified  
448 model, we distinguish between carbon in the cytosol (C<sub>int</sub>) and carbon in the carboxysome  
449 (C<sub>carb</sub>), and allow a flux for carbon to be lost from the carboxysome ( $\Phi_{\text{Loss2}}$ , Figure 5B).  
450 Therefore, external C<sub>i</sub> enters the cell (flux  $\Phi_{\text{in}}$ ) where it can either leak out (flux  $\Phi_{\text{Loss1}}$ ) or  
451 undergo active hydration (flux  $\Phi_{\text{VCA}}$ , where VCA denotes Vectoral Carbonic Anhydrase).  
452 Intracellular C<sub>i</sub> can then enter the carboxysome, where it is either fixed (flux  $\Phi_{\text{Rubisco}}$ ) or  
453 ultimately leaks out of the cell (flux  $\Phi_{\text{Loss2}}$ ).

454 We made similar simplifying assumptions as the traditional box model: i) an infinite  
455 supply of external carbon, ii) no isotopic fractionation for carbon lost from the cell, iii)  $\Phi_{\text{in}}$  has the  
456 isotopic fractionation associated with  $\epsilon_{\text{Diffusion}}$ , and iv) the system is at steady state. We did not  
457 add an explicit term for light energy used to power C<sub>i</sub> uptake. Instead, the model included an  
458 energized CA (denoted VCA) and its associated isotopic fractionation as free parameters. In  
459 modeling each strain, we used the appropriate  $\epsilon_{\text{Rubisco}}$  measurements (Table 1). We do not know  
460 the true value for  $\epsilon_{\text{VCA}}$ , but used a value of 30‰ similar to a recent model that explicitly invoked  
461 the NDH complex in Cyanobacteria (20). For comparison with the traditional model, we plotted  
462 Figure 5C with  $f_1 = 0.1$  so that it could be represented in two dimensions; see Figure S10 for full  
463 model outputs. In this updated model, each value of  $\epsilon_P$  corresponds to a set of feasible  $f_1$  and  $f_2$   
464 values that fall along a line (Figure S10). Therefore, our model constrains but does not uniquely  
465 determine  $f_1$  and  $f_2$ , nor does it allow for estimation of external C<sub>i</sub> levels because many pairs of  $f_1$   
466 and  $f_2$  values can produce the same  $\epsilon_P$ . **In addition, we focused only on C<sub>i</sub> uptake as CO<sub>2</sub>**  
467 **because we are interested in a model that could achieve large  $\epsilon_P$  values (indicating <sup>13</sup>C-depleted**  
468 **biomass) to account for at least an additional  $\sim$ 8‰ of fractionation in  $\epsilon_P$  (maximum of  $\sim$ 25‰ in**



469 the high light condition) *greater* than  $\epsilon_{\text{Rubisco}}$  (~17‰) in ANC.  $\text{HCO}_3^-$  uptake through bicarbonate  
 470 pumps would not achieve this effect because it would shift all  $\epsilon_p$  values to be 9‰ more negative  
 471 ( $^{13}\text{C}$ -enriched biomass, see Figure 1C).  
 472

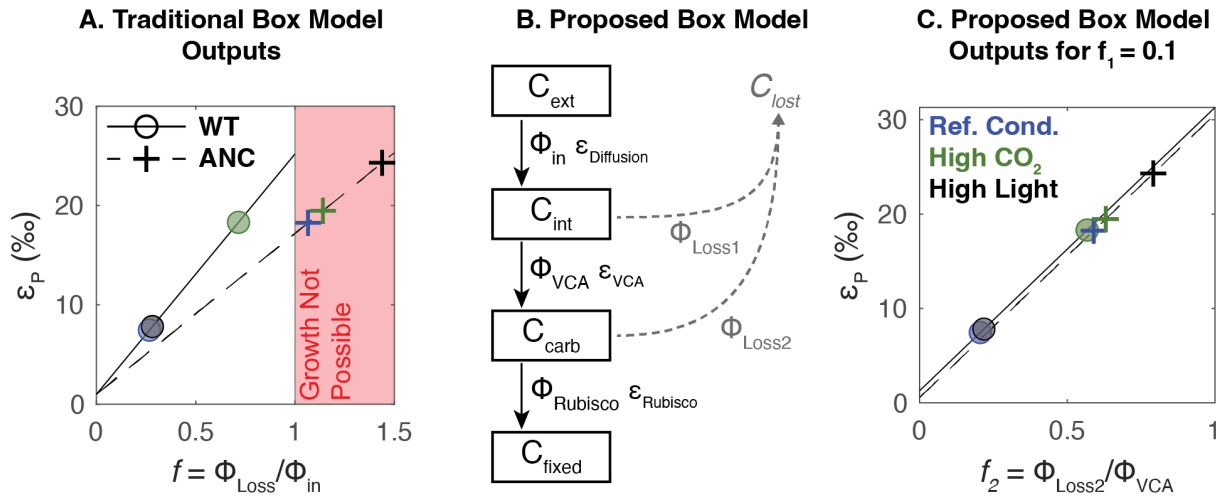

473  
 474 **Figure 5: Proposed box model based on experimental results.** A) Experimental results (circles and  
 475 crosses) plotted onto traditional box model outputs (dashed and solid lines) for WT and ANC respectively  
 476 if  $C_i$  uptake is all  $\text{CO}_2$ . Uncertainties are smaller than data points. Colors indicate growth conditions: blue  
 477 = reference condition (0.05%  $\text{pCO}_2$  (v/v), 120  $\mu\text{E}$ ); green = high  $\text{CO}_2$  (5%  $\text{pCO}_2$  (v/v), 120  $\mu\text{E}$ ); black =  
 478 high light (0.05%  $\text{pCO}_2$  (v/v), 500  $\mu\text{E}$ ).  $f$  is as defined in Figure 1; region where  $f > 1$  is shaded in red. B)  
 479 Proposed box model architecture, with main carbon pools of interest in boxes. Subscripts indicate  
 480 external (*ext*), internal (*int*), carboxysome (*carb*), and fixed (*fixed*) carbon pools. Fluxes are denoted by  $\Phi$   
 481 where subscripts indicate fluxes into the cell (*in*), out of the cell (*Loss1*, *Loss2*), into the carboxysome  
 482 (*VCA* for Vectoral Carbonic Anhydrase), and into fixed biomass (*Rubisco*), each with a corresponding  
 483 isotopic fractionation denoted with  $\epsilon$ . Loss fluxes were assumed to have no isotopic fractionation. In this  
 484 proposed model,  $f_1$  is defined as  $\Phi_{\text{Loss1}}/\Phi_{\text{in}}$ , and  $f_2$  is defined as  $\Phi_{\text{Loss2}}/\Phi_{\text{VCA}}$ . See text for model  
 485 assumptions. C) Experimental results plotted onto proposed box model outputs for  $f_1 = 0.1$ ; colors and  
 486 symbols are the same as Panel A.  $\epsilon_p$  is defined as the difference in  $\delta^{13}\text{C}$  between  $C_{\text{ext}}$  and  $C_{\text{fixed}}$ . See  
 487 Supplemental Figure S10 for full results; only results for  $f_1 = 0.1$  are shown.  
 488

489 With the addition of a powered, vectoral CA and an additional loss term, the model was  
 490 able to rationalize our experimental data of  $\epsilon_p > \epsilon_{\text{Rubisco}}$  with leakage values compatible with cell  
 491 growth ( $f_2 < 1$ , Figure 5C). In addition, it helped us understand why the high light condition gave  
 492 such varied results between WT and ANC. Our model results implied that ANC lost more carbon  
 493 than WT at the branch point before rubisco ( $\Phi_{\text{Loss2}}$ ); i.e. even though carbon was present in the  
 494 cell, it could not be fixed by the ancestral Form 1B rubisco, perhaps because of its lower  $V_C$   
 495 (Table 1). Excess  $\text{CO}_2$  allowed rubisco's KIE ( $\epsilon_{\text{Rubisco}}$ ) to be expressed in  $\epsilon_p$ . These results  
 496 implied that, in high light, the powered CA was delivering high amounts of  $\text{CO}_2$  to both the WT  
 497 and ANC rubiscos. The faster WT rubisco was able to match this flux, which was reflected in its  
 498 fast growth rate (Figure 3) and no change in  $\epsilon_p$  vs. the reference condition (Figure 2). However,  
 499 the slower ANC rubisco was not, which led to its slowest growth rate (Figure 2), and highest  $\epsilon_p$   
 500 values across all conditions. Conditions where  $\epsilon_p$  exceeded  $\epsilon_{\text{Rubisco}}$  in ANC suggested that, in

501 addition to  $\Phi_{\text{Loss2}}$  being large (allowing  $\epsilon_{\text{Rubisco}}$  to be expressed),  $\Phi_{\text{Loss1}}$  was high as well, which  
502 allows  $\epsilon_{\text{VCA}}$  to be expressed. That is, the slower ANC rubisco created a “backup” where leakage  
503 increased all along the carbon fixing pathway, and this effect was exaggerated at high light.

504 In addition, we fit our data to other models that are aware of active  $C_i$  uptake as part of  
505 general algal (21) or cyanobacterial (20, 59) CCMs (Figure S9). Cyanobacterial models that  
506 incorporated an explicitly one-way, “CA-like” enzyme (59) or the NDH complex specifically (20)  
507 were mostly able to rationalize our data as well. The poorest model fits for our data were when  
508  $C_i$  uptake was mostly as  $\text{HCO}_3^-$  (Figure S9). Overall, our model and theirs (20, 59) show that  
509 adding an additional carbon isotope fractionation step produces a model capable of rationalizing  
510 our data by enabling  $\epsilon_p > \epsilon_{\text{Rubisco}}$  with leakage values less than 1.

511 We also note that our use of the term “vectoral”  $\text{CO}_2$  hydration connotes a net flux that is  
512 dominantly in the direction of  $\text{CO}_2$  hydration, rather than implying that the flux of  $\text{HCO}_3^-$   
513 dehydration is zero. As such, there is likely some bidirectional activity of the NDH complex. It is  
514 difficult to experimentally measure the isotope effect associated with the hydration reaction ( $\text{CO}_2$   
515  $\Rightarrow \text{HCO}_3^-$ ), but transition state theory and quantum chemical modeling (67, 68, 71) suggest that  
516 the value is large (roughly 25‰, see (28) for review).  $\text{HCO}_3^-$  dehydration, and equilibration in  
517 general, would tend to reduce the isotopic fractionation (67). Our results here do not require a  
518 larger isotopic effect, however. Rather, a smaller value of  $\approx 10\text{‰}$  would have allowed us to  
519 rationalize our measurements, as we need only account for an additional  $\approx 8\text{‰}$  of fractionation in  
520  $\epsilon_p$  (maximum of  $\approx 25\text{‰}$ ) above  $\epsilon_{\text{Rubisco}}$  ( $\approx 17\text{‰}$ ) in ANC.

521 Overall, our measurements and analyses indicated that, in addition to rubisco,  
522 processes relevant to the CCM can play an important role in setting  $\epsilon_p$  values. While our model  
523 is highly idealized and relies on a minimum set of fractionating processes associated with  
524 carbon fixation in Cyanobacteria, i.e. adding only one additional fractionation factor and one  
525 additional leakage point, the results demonstrated that a simple addition to the traditional model  
526 accounting for a known mode of energized  $\text{CO}_2$  uptake can explain our experimental results.  
527 Moreover, one useful implication of this model is that carbon isotope values may measure the  
528 efficiency of the CCM and carbon fixation in Cyanobacteria, in addition to ambient  
529 environmental  $\text{CO}_2$  concentrations.

### 530 Consequences for understanding the evolution of carbon-fixing metabolisms

531 The goal of this study was to test if prevailing models of carbon fixation and isotopic  
532 fractionation held up in an ancestral analogue strain that may be more relevant to understanding  
533 the carbon cycle over geologic time. We did so by measuring the isotopic fractionation of a  
534 reconstructed ancestral rubisco both inside and outside a living Cyanobacterium. We  
535 emphasize that ANC is not a true ancestral Cyanobacteria; rather it is a chimeric construct—a  
536 modern strain saddled with a predicted Precambrian enzyme. This reconstructed ancestral  
537 rubisco is characterized by slower carboxylation kinetics (46) and a much lower  $\epsilon_{\text{rubisco}}$  than the  
538 modern strain’s native enzyme (Table 1).

539 Recent studies in extant bacterial (20) and eukaryotic algae (for review see (28)) have  
540 already motivated updated models of C isotope fractionation in cells; these models address

541 observations that: i)  $\epsilon_p$  can exceed  $\epsilon_{\text{Rubisco}}$  in certain conditions; ii) factors other than  $p\text{CO}_2$  can  
542 modulate  $\epsilon_p$ . We observed similar phenomena in our ANC strain, where  $\epsilon_p$  exceeded  $\epsilon_{\text{Rubisco}}$  in  
543 all conditions tested, and increased light intensity led to greater  $\epsilon_p$  values. To date, such  
544 anomalous  $\epsilon_p$  values have been observed during relatively slow growth; in (76)  $\epsilon_p > \epsilon_{\text{Rubisco}}$   
545 occurred early in the growth curve as cells were acclimating to fresh culture media, in (28)  $\epsilon_p >$   
546  $\epsilon_{\text{Rubisco}}$  occurred during nitrogen and phosphorus limitation, and in this study  $\epsilon_p > \epsilon_{\text{Rubisco}}$  was  
547 observed in a mutant strain growing slowly while expressing a reconstructed ancestral rubisco.  
548 These observations indicated that growth physiology affects isotopic fractionation by  
549 photosynthetic algae and, in all cases, motivated a rethinking of the traditional box model  
550 (Figure 1B,C) to include more physiological detail relating to the presence of a CCM.

551 Here we observed  $\epsilon_p > \epsilon_{\text{Rubisco}}$  in all growth conditions for ANC, and especially in high  
552 light (Figure 2). As high light consistently slowed growth, induced chlorosis (yellowing of  
553 cultures, Figure S11) and increased  $\epsilon_p$ , we were motivated to consider the effects of light-related  
554 physiology on  $\epsilon_p$ . The yellowing of ANC cultures in high light was consistent with the well-  
555 described phycobilisome degradation pathway, which is typically induced in nutrient starvation  
556 conditions and taken to indicate that light levels exceeded the downstream capacity for  $\text{CO}_2$   
557 fixation (58, 77). We interpreted these observations as indicating that the replacement of the  
558 native rubisco with a reconstructed ancestor decreased the cellular capacity for  $\text{CO}_2$  fixation,  
559 potentially due to the inferior carboxylation rate of the ancestral enzyme (Table 1).

560 Low  $\text{CO}_2$  fixation capacity would not, on its own, explain anomalously high  $\epsilon_p$  values,  
561 however. An additional fractionating process is required to explain  $\epsilon_p$  values in excess of  $\epsilon_{\text{Rubisco}}$ ,  
562 which we assumed is due to light-coupled vectorial hydration of  $\text{CO}_2$ , which has a large  
563 calculated isotope effect (67, 69–72). Cyanobacteria have been shown to take up  $\text{CO}_2$   
564 independently of  $\text{HCO}_3^-$  (61). In model Cyanobacteria, this activity is due to the Cup proteins  
565 (CupAS/B, also known as Chp proteins), which bind to the NDH complex of Cyanobacteria (66,  
566 78). The NDH complex is involved in light energy capture via photosynthetic electron transport  
567 and cyclic electron flow around photosystem I (66) and, moreover,  $\text{CO}_2$  uptake is stimulated by  
568 light alone and abrogated by inhibitors of photochemical electron transport (73). Not only has  
569 CupA been shown to carry a key  $\text{Zn}^{2+}$  in a domain resembling a carbonic anhydrase (66), but  
570 the *cupA* gene is induced under low  $\text{CO}_2$  conditions (78). In order for  $\text{CO}_2$  uptake to drive the  
571 CCM and promote  $\text{CO}_2$  fixation, it would need to produce a high, non-equilibrium  $\text{HCO}_3^-$   
572 concentration in the cytoplasm (8, 10). We and others therefore assumed that the complex of  
573 NDH-1 and CupAS/B couples light energy to the one-way hydration of  $\text{CO}_2$  to  $\text{HCO}_3^-$  at a  
574 carbonic anhydrase-like active site (66).

575 It is readily apparent from our experiments that  $\epsilon_{\text{Rubisco}}$  does not set an upper bound on  
576  $\epsilon_p$ , nor does it predict which strains will have larger  $\epsilon_p$  values *in vivo* (Figure 2). This inference  
577 was only possible because we measured the isotope fractionation due to the ancestral rubisco  
578 ( $\epsilon_{\text{Rubisco}}$ ) and compared it to ANC strain biomass ( $\epsilon_p$ ), in contrast with the study of (57), which  
579 measured  $\epsilon_p$  but not  $\epsilon_{\text{Rubisco}}$ . While our ANC  $\epsilon_p$  values ( $\approx 18\text{-}24\%$ ) fell within the range of  $\epsilon_p$   
580 values derived from the carbon isotope record (42), they exceeded its measured  $\epsilon_{\text{Rubisco}}$  (Figure  
581 2). As such, the relative consistency of ANC  $\epsilon_p$  values with extant  $\epsilon_p$  values does not indicate  
582 that the traditional box model is applicable across geologic time as claimed in (57). Rather, a  
583 model including some additional fractionating process is required to explain our observation that  
584  $\epsilon_p > \epsilon_{\text{Rubisco}}$  in ANC. Attention has been paid to outliers in the carbon isotope record where  $\epsilon_p$

585 exceeds  $\epsilon_{\text{Rubisco}}$  precisely because they violate the assumptions underlying the dominant model  
586 (Equation 1) used to interpret the record (28). In addition, ANC  $\epsilon_{\text{Rubisco}}$  ( $17.23 \pm 0.61\%$ ) is  
587 anomalously low; not only is it  $\approx 8\%$  less than WT  $\epsilon_{\text{Rubisco}}$  ( $25.18 \pm 0.31\%$ ) but it is among the  
588 lowest measured rubisco KIEs. However, only thirteen unique rubisco KIEs have been  
589 measured thus far (for recent review see (26)) while  $\approx 300$  distinct rubiscos have been kinetically  
590 characterized (7, 79), suggesting that measuring the isotopic effects of several well-chosen  
591 rubisco variants is worthwhile.

592 Our study in an ancestral analogue strain suggests that the carbon isotopic  
593 fractionations observed in both modern environments and in the geological record reflect not  
594 just the environmental abundance of  $\text{CO}_2$  and/or the rubisco present, but also the operation of  
595  $\text{C}_i$  uptake processes, like the NDH complex, that operate as part of the CCM. Both these  
596 processes can lead to a highly variable range of carbon isotope fractionations. Our study  
597 supports the conclusion of prior studies that a carbon isotope model that engages more fully  
598 with photosynthetic physiology, like the CCM, is required to describe  $\epsilon_p$  values and more  
599 accurately constrain environmental  $\text{CO}_2$  concentrations from environmental context (e.g. light  
600 and nutrient levels) and physiological parameters (e.g.  $\epsilon_{\text{Rubisco}}$ , photosynthetic capacity, growth  
601 rate). The model proposed here was written to mathematically validate a hypothesis – that  $\epsilon_p$   
602 can only exceed  $\epsilon_{\text{Rubisco}}$  if another fractionating process was considered. In addition, it  
603 represents only a first step in this direction as it substantially simplifies the bacterial CCM (10); a  
604 similar statement applies to box models of Eukaryotic algae which also express complex CCMs  
605 (28, 80). Future work on carbon isotope fractionation by Cyanobacteria should grapple in more  
606 detail with photosynthetic physiology, including uptake of  $\text{CO}_2$  and  $\text{HCO}_3^-$  by independent  
607 systems, integration of both light and dark reactions, and effects of nutrient limitation on growth  
608 rate. As mechanistic biochemical understanding of cyanobacterial  $\text{C}_i$  uptake improves (66), it  
609 may also become feasible to directly measure or better constrain the isotopic fractionation  
610 associated with these processes. Coupling such a model with experiments in natural and  
611 engineered organisms will help validate these models and improve our ability to understand  
612 environmental and evolutionary changes of the carbon cycle over Earth history.

613 In addition, this study and other recent work (42, 57) have raised a greater question for  
614 the Earth Sciences: what is uniformitarianism for biology? Earth scientists often apply  
615 uniformitarian assumptions – assuming that physical and chemical processes behave the same  
616 now as they did billions of years ago – in order to reason about the past. This approach is  
617 powerful, but these assumptions are challenged by biological processes that undergo  
618 substantial evolution on geologic timescales. Ongoing discoveries of novel metabolisms have  
619 supported some principles like ‘the principle of microbial infallibility’ – that microbes will always  
620 find a way to take advantage of available energy sources (for recent review see 81) – but it is  
621 not clear what principles apply to the details of metabolism. Take rubisco, for example – most  
622 extant autotrophs use rubisco to fix carbon, but rubisco sits within a variety of broader  
623 metabolisms (i.e.  $\text{C}_3$ ,  $\text{C}_4$ , CAM in plants) that temper the effect of  $\epsilon_{\text{Rubisco}}$  on  $\epsilon_p$  (for recent review  
624 see (26)). We are far from having a clear answer to this question, but recent work at the  
625 interface of molecular biology and isotope geochemistry show that these ideas can be tested in  
626 the lab. Here and in other recent papers (42, 57, 82), we used synthetic biology to construct

627 organisms with ancestral components so that specific aspects of ancient organisms can be  
628 isolated and tested. These “ancestral-like” organisms helped sharpen our understanding of the  
629 physiological and environmental factors determining growth (82) and isotopic fractionation (this  
630 work) in both ancient and modern autotrophs, and showed that models rigidly based on modern  
631 taxa are likely not universally applicable across geologic timescales.

632 Overall, carbon fixation was a fundamental challenge that autotrophs overcame early in  
633 the history of Earth’s biosphere (1). These early processes were recorded in some fashion in  
634 the carbon isotope record, but robust interpretation of this record must grapple with the fact that  
635 the carbon cycle is an amalgam of both environmental changes and evolutionary processes,  
636 mediated by physiology. We now have synthetic biological approaches that offer a way to probe  
637 these long timescale co-evolutionary problems by producing ancient process analogs of carbon  
638 fixation in the laboratory.

## 639 Materials and Methods

### 640 **Ancestral enzyme reconstruction**

641 Ancestral Rubisco enzyme sequences were previously reported and characterized by Shih et al.  
642 (2016) (46). Briefly, for both the large subunit (LSU) and small subunit (SSU) of Rubisco,  
643 encoded by *rbcL* and *rbcS* respectively, the most recent common ancestor (MRCA) for Form 1A  
644 ( $\alpha$ ), 1B ( $\beta$ ), and 1A/B ( $\alpha/\beta$ ) clades were predicted from independently derived phylogenetic  
645 trees for RbcL and RbcS containing a broad diversity of Form 1A and 1B Rubisco (>100  
646 sequences). Maximum-likelihood algorithms were used to reconstruct the most probable  
647 ancestral sequence for each clade. Ancestral sequences were then expressed in *Escherichia*  
648 *coli* and purified, and enzyme kinetics were measured.

649

### 650 **ANC strain generation**

651 The ‘ANC’ strain studied here was generated by replacing the native large and small Rubisco  
652 subunits (*cbbL* and *cbbS* respectively) of the parent strain (*Synechococcus elongatus* PCC  
653 7942) with the reconstructed  $\beta$  ancestral *cbbL* and *cbbS* sequences. The NS2-KanR (‘WT’  
654 strain) was generated by inserting a KanR cassette into neutral site 2 (NS2) (GenBank:  
655 U44761.1). This was done as a control for having the KanR in the neutral site. *Synechococcus*  
656 *elongatus* PCC 7942 were transformed from the WT strain using the approach of Golden and  
657 Sherman (1984) (83). Briefly, cultures were grown to OD<sub>750nm</sub> = 0.5. Cultures were  
658 centrifuged at 18,000 x *g* for 2 minutes. Pellets were washed with 100 mM CaCl<sub>2</sub> and spun  
659 again at 18,000 x *g* for 2 minutes. Pellets were resuspended in BG-11 media followed by  
660 addition of plasmid and grown for 16 hours in the dark at 30°C. Transformants were then plated  
661 onto BG-11 + KAN100 agar plates and placed under 100  $\mu$ E of light at 30°C. Single colonies  
662 were then genotyped by PCR amplification of the Rubisco locus followed by sequencing. Table  
663 S1 lists plasmids and primers used in this study.

664

### 665 **Growth conditions**

666 For ambient CO<sub>2</sub> growth, NS2-KanR and  $\beta$  Ancestral Rubisco-KanR strains were grown in  
667 quadruplicate in a photobioreactor (Photon Systems Instruments - MC 1000) at the University of  
668 California, Berkeley (UC Berkeley) for four biological replicates total. Cultures were grown in



669 buffered BG-11 media with 50mM HEPES at pH 8. Cultures were inoculated at a starting  
670 OD<sub>720nm</sub> = 0.015 and cultivated at 120 μE, 30°C, and bubbled with ambient air. High CO<sub>2</sub>  
671 growth was performed using the same conditions as ambient growth with the exception of  
672 placing the photobioreactor in a 5% CO<sub>2</sub> chamber (Percival AR22L) and bubbling in air from the  
673 chamber. High light growth was performed using the ambient conditions above with the  
674 exception of using 500 μE for light intensity. Cells were harvested by centrifugation at 6000 x g  
675 for 20 minutes at 4°C. Decanted pellets were then flash frozen with liquid N<sub>2</sub> and lyophilized  
676 overnight with the Millrock Technology Model BT85A freeze dryer. Doubling time was calculated  
677 by fitting the exponential phase of growth (*k*) using a Markov Chain Monte Carlo (MCMC)  
678 approach, using the generic model  $y = a \cdot \text{EXP}(k \cdot x) + b$ . Growth curves displayed in Figure 3 were  
679 smoothed with a rolling median (*n* = 12) to remove errant readings caused by bubbles advected  
680 in front of the detector. See Supplemental for more information.

### 681 682 **Carbon isotope analysis**

683 Carbon isotope data is reported using delta notation ( $\delta^{13}\text{C}$ ) in units of per mille (‰) where  $\delta^{13}\text{C}$   
684 =  $[(^{13}\text{C}/^{12}\text{C})_{\text{sa}} / (^{13}\text{C}/^{12}\text{C})_{\text{ref}} - 1] \cdot 1000$ , where the subscripts 'sa' and 'ref' denote sample and  
685 reference respectively. The reference used is the Vienna Pee Dee Belemnite (VPDB).  $\delta^{13}\text{C}$   
686 values of cyanobacterial cells were measured on an EA-IRMS (Elemental Analyzer Isotope  
687 Ratio Mass Spectrometer; Costech Thermo Delta-V) at the California Institute of Technology  
688 (Caltech) in Pasadena, CA. Each biological replicate was run four times with two different  
689 isotope standards – urea (-27.8‰) and sucrose (-10.45‰). A suite of urea and sucrose  
690 standards were run at the beginning, middle, and end of run for sample bracketing and to  
691 assess drift throughout the run. An average  $\delta^{13}\text{C}$  and standard error were calculated and  
692 reported for each biological replicate (see Supplemental for more information). The  $\delta^{13}\text{C}$  of the  
693 starting CO<sub>2</sub> gas was measured on the Thermo Mat 253 Ultra at Caltech; the CALT-2049C  
694 standard was used, which has a  $\delta^{13}\text{C}_{\text{VPDB}}$  value of -3.62‰. CO<sub>2</sub> gas from high pCO<sub>2</sub>  
695 experiments was sourced from a CO<sub>2</sub> tank, while the CO<sub>2</sub> gas in ambient pCO<sub>2</sub> experiments  
696 was distilled from ambient lab air through cryogenic distillation at Caltech.  $\epsilon_p$ , the carbon isotope  
697 fractionation between CO<sub>2</sub> gas and bulk cyanobacterial cells, was calculated as  $(\alpha_{\text{CO}_2/\text{bio}} -$   
698  $1) \cdot 1000$ , where  $\alpha_{\text{CO}_2/\text{bio}} = ^{13}\text{R}_{\text{CO}_2} / ^{13}\text{R}_{\text{bio}}$ , where  $^{13}\text{R}$  is the ratio of  $^{13}\text{C}$  to  $^{12}\text{C}$  in the analyte. We note  
699 this in contrast to other isotope literature where  $\epsilon_p$  is calculated as  $(\alpha_{\text{bio}/\text{CO}_2} - 1) \cdot 1000$ , which would  
700 cause the positive values in this study to be negative. In this study, more positive  $\epsilon_p$  values  
701 indicate more  $^{13}\text{C}$ -depleted; see Supplemental for more detail.

### 702 703 **Rubisco KIE assay**

704 *Syn6301* and  $\beta$ -MRCA Rubisco were purified according to previous methodologies (84, 85) at  
705 University of California, Davis and then shipped on dry ice to Caltech. Clarified lysate from a  
706 BL21 DE3 Star *E. coli* culture expressing Rubisco was subjected to ammonium sulfate  
707 precipitation, at the 30-40% cut for *Syn6301* and at the 40-50% cut for  $\beta$ -MRCA, followed by  
708 anion exchange chromatography and size exclusion chromatography. We then used the  
709 substrate depletion method to measure the KIE of the *Syn6301* and  $\beta$ -MRCA Rubiscos ( $\epsilon_{\text{Rubisco}}$ ),  
710 as used previously in similar studies (47–50). Briefly, an assay mix of HCO<sub>3</sub><sup>-</sup>, bovine carbonic  
711 anhydrase, rubisco, ribulose 1,5-bisphosphate (RuBP), MgCl<sub>2</sub>, bicine, and dithiothreitol (DTT)  
712 was prepared. As the reaction progressed to completion, aliquots of that assay mix were

713 injected into pre-filled exetainers containing phosphoric acid that both stopped the reaction and  
714 converted all inorganic carbon species to gaseous CO<sub>2</sub>. The δ<sup>13</sup>C of these CO<sub>2</sub> aliquots was  
715 then measured on a Delta-V Advantage with Gas Bench and Costech elemental analyzer at  
716 Caltech. Here, instead of RuBP being given in excess, CO<sub>2</sub> was given in excess. In addition,  
717 instead of determining the fraction of CO<sub>2</sub> (*f*) consumed independently to create a Rayleigh plot,  
718 we fit the curvature of the δ<sup>13</sup>C results to find *f* before converting to a Rayleigh plot to calculate  
719 ε<sub>Rubisco</sub>, similar to previous studies (48). See Supplemental for more information.

720

### 721 **Transmission Electron Microscopy (TEM) Imaging of Whole Cells**

722 WT and ANC strains were grown in the reference condition as stated above (buffered BG-11  
723 media, shaking at 250 rpm, with white cool fluorescent light at 120 μE, 30°C, and bubbled with  
724 ambient air (0.04% CO<sub>2</sub> (v/v)). WT and ANC cells were collected at mid-log (40 and 80 h,  
725 respectively) at OD<sub>730</sub>=0.4 and pelleted by centrifugation (10,000 x *g* for 10 min). Pelleted cells  
726 were then resuspended in 1 mL of cold solution 2.5% Glutaraldehyde in 0.1M Sodium  
727 Cacodylate Buffer, pH 7.4 (Electron Microscopy Sciences) and stored in the fixative solution at  
728 4°C until imaging. Sample preparation and sectioning were performed in the Electron  
729 Microscope Laboratory core facility at the University of California Berkeley. Briefly, samples  
730 were stabilized in 1% low melting-point agarose, cut into small cubes, and then washed at room  
731 temperature with 0.1 M sodium cacodylate buffer, pH 7. Samples were then mixed with 1%  
732 osmium tetroxide, 1.6% potassium ferricyanide and 0.1 M cacodylate buffer pH 7.2 for an hour  
733 in the dark with rotation. These were washed again with a cacodylate buffer pH 7.2, then DI  
734 water, and subjected to an 1 h incubation with uranyl acetate 0.5% solution. After a new wash  
735 with DI water, samples were dehydrated by an ascending series of acetone concentration (35%,  
736 50%, 75%, 80%, 90%, 100%, 100%). Later, samples were progressively infiltrated in resin  
737 (Epon solution: Eponate 12, DDSA NMA and BDMA (Electron Microscopy Sciences) with  
738 rotation, followed by a final step at 60°C until polymerized. Thin sections (70 nm) were cut using  
739 a Reichert Ultracut E (Leica Microsystems) and collected on 100 mesh formvar coated copper  
740 grids. Sections were post-stained using 2% uranyl acetate in 70% methanol and followed with  
741 Reynold's lead citrate. The sections were imaged using a FEI Tecnai 12 transmission electron  
742 microscope operated at 120 kV (FEI). Images were collected using UltraScan 1000 digital  
743 micrograph software (Gatan Inc).

744

### 745 **Acknowledgments**

746 We thank Newton Nguyen for valuable guidance in the MCMC model used to calculate doubling  
747 times from growth curve data. We thank Victoria Orphan and Alex Sessions for access to lab  
748 space and analytical instruments, as well as lab managers Stephanie A. Connon, Fenfang Wu,  
749 and Nami Kitchen for assistance. This research was supported by the David and Lucille  
750 Packard Foundation (12540178), Simons Foundation (554187), NASA Exobiology (00010652),  
751 and the Schwartz-Reisman Collaborative Science Program (12520057). R.Z.W. was supported  
752 by a National Science Foundation Graduate Research Fellowship. Work in the lab of D.F.S. was  
753 supported by the US Department of Energy (DE-SC00016240). Work in the lab of P.M.S. was  
754 supported by a Society in Science–Branco Weiss fellowship from ETH Zürich and a Packard

755 Fellowship from the David Lucile Packard Foundation. We thank Danielle Jorgens and Reena  
756 Zalpuri at the University of California Berkeley Electron Microscope Laboratory for advice and  
757 assistance in electron microscopy sample preparation and data collection.

758

## 759 References

### 760 Bibliography

- 761 1. W. W. Fischer, J. Hemp, J. E. Johnson, Evolution of oxygenic photosynthesis. *Annu. Rev.*  
762 *Earth Planet. Sci.* **44**, 647–683 (2016).
- 763 2. Y. M. Bar-On, R. Milo, The global mass and average rate of rubisco. *Proc Natl Acad Sci*  
764 *USA* **116**, 4738–4743 (2019).
- 765 3. S. G. Wildman, Along the trail from Fraction I protein to Rubisco (ribulose biphosphate  
766 carboxylase-oxygenase). *Photosyn. Res.* **73**, 243–250 (2002).
- 767 4. G. H. Lorimer, T. J. Andrews, Plant photorespiration—an inevitable consequence of the  
768 existence of atmospheric oxygen. *Nature* **243**, 359–360 (1973).
- 769 5. T. J. Andrews, G. H. Lorimer, *The Biochemistry of Plants: A Comprehensive Treatise, Vol.*  
770 *10, Photosynthesis*, M. D. Hatch, N. K. Boardman, Eds. (1987).
- 771 6. A. Bar-Even, *et al.*, The moderately efficient enzyme: evolutionary and physicochemical  
772 trends shaping enzyme parameters. *Biochemistry* **50**, 4402–4410 (2011).
- 773 7. A. I. Flamholz, *et al.*, Revisiting Trade-offs between Rubisco Kinetic Parameters.  
774 *Biochemistry* **58**, 3365–3376 (2019).
- 775 8. A. Flamholz, P. M. Shih, Cell biology of photosynthesis over geologic time. *Curr. Biol.* **30**,  
776 R490–R494 (2020).
- 777 9. B. D. Rae, B. M. Long, M. R. Badger, G. D. Price, Functions, compositions, and evolution  
778 of the two types of carboxysomes: polyhedral microcompartments that facilitate CO<sub>2</sub>  
779 fixation in cyanobacteria and some proteobacteria. *Microbiol. Mol. Biol. Rev.* **77**, 357–379  
780 (2013).
- 781 10. N. M. Mangan, A. Flamholz, R. D. Hood, R. Milo, D. F. Savage, pH determines the  
782 energetic efficiency of the cyanobacterial CO<sub>2</sub> concentrating mechanism. *Proc Natl Acad*  
783 *Sci USA* **113**, E5354-62 (2016).
- 784 11. J. A. Raven, J. Beardall, CO<sub>2</sub> concentrating mechanisms and environmental change.  
785 *Aquatic Botany* **118**, 24–37 (2014).
- 786 12. G. D. Price, *et al.*, The cyanobacterial CCM as a source of genes for improving  
787 photosynthetic CO<sub>2</sub> fixation in crop species. *J. Exp. Bot.* **64**, 753–768 (2013).
- 788 13. R. Riding, Cyanobacterial calcification, carbon dioxide concentrating mechanisms, and  
789 Proterozoic/Cambrian changes in atmospheric composition. *Geobiology* **4**, 299–316  
790 (2006).
- 791 14. M. Schidlowski, A 3,800-million-year isotopic record of life from carbon in sedimentary

- 792 rocks. *Nature* **333**, 313–318 (1988).
- 793 15. J. Krissansen-Totton, R. Buick, D. C. Catling, A statistical analysis of the carbon isotope  
794 record from the Archean to Phanerozoic and implications for the rise of oxygen. *Am. J.*  
795 *Sci.* **315**, 275–316 (2015).
- 796 16. J. M. Hayes, Factors controlling  $^{13}\text{C}$  contents of sedimentary organic compounds:  
797 Principles and evidence. *Mar. Geol.* **113**, 111–125 (1993).
- 798 17. R. Francois, *et al.*, Changes in the  $\delta^{13}\text{C}$  of surface water particulate organic matter across  
799 the subtropical convergence in the SW Indian Ocean. *Global Biogeochem. Cycles* **7**, 627–  
800 644 (1993).
- 801 18. R. Park, S. Epstein, Carbon isotope fractionation during photosynthesis. *Geochim.*  
802 *Cosmochim. Acta* **21**, 110–126 (1960).
- 803 19. G. D. Farquhar, M. H. O’Leary, J. A. Berry, On the relationship between carbon isotope  
804 discrimination and the intercellular carbon dioxide concentration in leaves. *Aust. J. Plant*  
805 *Physiol.* **9**, 121 (1982).
- 806 20. M. Eichner, S. Thoms, S. A. Kranz, B. Rost, Cellular inorganic carbon fluxes in  
807 *Trichodesmium*: a combined approach using measurements and modelling. *J. Exp. Bot.*  
808 **66**, 749–759 (2015).
- 809 21. T. D. Sharkey, J. A. Berry, “Carbon Isotope Fractionation of Algae as Influenced by an  
810 Inducible  $\text{CO}_2$  Concentrating Mechanism” in *Inorganic Carbon Uptake by Aquatic*  
811 *Photosynthetic Organisms*, W. J. Lucas, J. A. Berry, Eds. (The American Society of Plant  
812 Physiologists, 1985), pp. 389–401.
- 813 22. W. G. Mook, J. C. Bommerson, W. H. Staverman, Carbon isotope fractionation between  
814 dissolved bicarbonate and gaseous carbon dioxide. *Earth and Planetary Science Letters*  
815 **22**, 169–176 (1974).
- 816 23. J. P. Jasper, J. M. Hayes, A carbon isotope record of  $\text{CO}_2$  levels during the late  
817 Quaternary. *Nature* **347**, 462–464 (1990).
- 818 24. M. Pagani, *et al.*, The role of carbon dioxide during the onset of Antarctic glaciation.  
819 *Science* **334**, 1261–1264 (2011).
- 820 25. J. A. Higgins, *et al.*, Atmospheric composition 1 million years ago from blue ice in the  
821 Allan Hills, Antarctica. *Proc Natl Acad Sci USA* **112**, 6887–6891 (2015).
- 822 26. A. K. Garcia, C. M. Cavanaugh, B. Kacar, The curious consistency of carbon  
823 biosignatures over billions of years of Earth-life coevolution. *ISME J.* **15**, 2183–2194  
824 (2021).
- 825 27. G. D. Farquhar, J. R. Ehleringer, K. T. Hubick, Carbon Isotope Discrimination and  
826 Photosynthesis. *Annu. Rev. Plant Physiol. Plant Mol. Biol.* **40**, 503–537 (1989).
- 827 28. E. B. Wilkes, A. Pearson, A general model for carbon isotopes in red-lineage  
828 phytoplankton: Interplay between unidirectional processes and fractionation by RubisCO.  
829 *Geochim. Cosmochim. Acta* (2019) <https://doi.org/10.1016/j.gca.2019.08.043>.
- 830 29. A. J. Boller, P. J. Thomas, C. M. Cavanaugh, K. M. Scott, Low stable carbon isotope

- 831 fractionation by coccolithophore RubisCO. *Geochim. Cosmochim. Acta* **75**, 7200–7207  
832 (2011).
- 833 30. J. M. Hayes, H. Strauss, A. J. Kaufman, The abundance of  $^{13}\text{C}$  in marine organic matter  
834 and isotopic fractionation in the global biogeochemical cycle of carbon during the past 800  
835 Ma. *Chem. Geol.* **161**, 103–125 (1999).
- 836 31. B. N. Popp, *et al.*, Effect of phytoplankton cell geometry on carbon isotopic fractionation.  
837 *Geochim. Cosmochim. Acta* **62**, 69–77 (1998).
- 838 32. E. A. Laws, B. N. Popp, R. R. Bidigare, M. C. Kennicutt, S. A. Macko, Dependence of  
839 phytoplankton carbon isotopic composition on growth rate and  $[\text{CO}_2]_{\text{aq}}$ : Theoretical  
840 considerations and experimental results. *Geochim. Cosmochim. Acta* **59**, 1131–1138  
841 (1995).
- 842 33. R. R. Bidigare, *et al.*, Consistent fractionation of  $^{13}\text{C}$  in nature and in the laboratory:  
843 Growth-rate effects in some haptophyte algae. *Global Biogeochem. Cycles* **11**, 279–292  
844 (1997).
- 845 34. Y. G. Zhang, J. Henderiks, X. Liu, Refining the alkenone- $\text{pCO}_2$  method II: Towards  
846 resolving the physiological parameter ‘b.’ *Geochim. Cosmochim. Acta* **281**, 118–134  
847 (2020).
- 848 35. G. H. Rau, U. Riebesell, D. Wolf-Gladrow, A model of photosynthetic  $^{13}\text{C}$  fractionation by  
849 marine phytoplankton based on diffusive molecular  $\text{CO}_2$  uptake. *Mar. Ecol. Prog. Ser.*  
850 **133**, 275–285 (1996).
- 851 36. M. H. O’Leary, Measurement of the isotope fractionation associated with diffusion of  
852 carbon dioxide in aqueous solution. *J. Phys. Chem.* **88**, 823–825 (1984).
- 853 37. N. Cassar, E. A. Laws, B. N. Popp, Carbon isotopic fractionation by the marine diatom  
854 *Phaeodactylum tricornutum* under nutrient- and light-limited growth conditions. *Geochim.*  
855 *Cosmochim. Acta* **70**, 5323–5335 (2006).
- 856 38. J. A. Berry, “Studies of mechanisms affecting the fractionation of carbon isotopes in  
857 photosynthesis” in *Stable Isotopes in Ecological Research*, Ecological Studies., P. W.  
858 Rundel, J. R. Ehleringer, K. A. Nagy, Eds. (Springer New York, 1989), pp. 82–94.
- 859 39. H. Gimmler, C. Weiss, M. Baier, W. Hartung, The conductance of the plasmalemma for  
860  $\text{CO}_2$ . *J. Exp. Bot.* **41**, 785–795 (1990).
- 861 40. C. Rotatore, R. R. Lew, B. Colman, Active uptake of  $\text{CO}_2$  during photosynthesis in the  
862 green alga *Eremosphaera viridis* is mediated by a  $\text{CO}_2$ -ATPase. *Planta* **188**, 539–545  
863 (1992).
- 864 41. D. S. Ittemeyer, K. Biehler, Heinrich P. Fock, Evidence for the contribution of pseudocyclic  
865 photophosphorylation to the energy requirement of the mechanism for concentrating  
866 inorganic carbon in *Chlamydomonas*. *Planta* **189** (1993).
- 867 42. S. J. Hurley, B. A. Wing, C. E. Jasper, N. C. Hill, J. C. Cameron, Carbon isotope evidence  
868 for the global physiology of Proterozoic cyanobacteria. *Sci. Adv.* **7** (2021).
- 869 43. A. K. Garcia, *et al.*, System-level effects of  $\text{CO}_2$  and RuBisCO concentration on carbon



- 870 isotope fractionation. *BioRxiv* (2021) <https://doi.org/10.1101/2021.04.20.440233>.
- 871 44. M. Kędzior, *et al.*, Molecular foundations of Precambrian uniformitarianism. *BioRxiv*  
872 (2021) <https://doi.org/10.1101/2021.05.31.446354>.
- 873 45. B. Kacar, V. Hanson-Smith, Z. R. Adam, N. Boekelheide, Constraining the timing of the  
874 Great Oxidation Event within the Rubisco phylogenetic tree. *Geobiology* **15**, 628–640  
875 (2017).
- 876 46. P. M. Shih, *et al.*, Biochemical characterization of predicted Precambrian RuBisCO. *Nat.*  
877 *Commun.* **7**, 10382 (2016).
- 878 47. R. D. Guy, M. L. Fogel, J. A. Berry, Photosynthetic fractionation of the stable isotopes of  
879 oxygen and carbon. *Plant Physiol.* **101**, 37–47 (1993).
- 880 48. D. B. McNevin, M. R. Badger, H. J. Kane, G. D. Farquhar, Measurement of (carbon)  
881 kinetic isotope effect by Rayleigh fractionation using membrane inlet mass spectrometry  
882 for CO<sub>2</sub>-consuming reactions. *Funct. Plant Biol.* **33**, 1115 (2006).
- 883 49. K. M. Scott, J. Schwedock, D. P. Schrag, C. M. Cavanaugh, Influence of form IA RubisCO  
884 and environmental dissolved inorganic carbon on the delta<sup>13</sup>C of the clam-  
885 chemoautotroph symbiosis *Solemya velum*. *Environ. Microbiol.* **6**, 1210–1219 (2004).
- 886 50. P. J. Thomas, *et al.*, Isotope discrimination by form IC RubisCO from *Ralstonia eutropha*  
887 and *Rhodobacter sphaeroides*, metabolically versatile members of “Proteobacteria” from  
888 aquatic and soil habitats. *Environ. Microbiol.* (2018) [https://doi.org/10.1111/1462-](https://doi.org/10.1111/1462-2920.14423)  
889 [2920.14423](https://doi.org/10.1111/1462-2920.14423).
- 890 51. G. G. B. Tcherkez, G. D. Farquhar, T. J. Andrews, Despite slow catalysis and confused  
891 substrate specificity, all ribulose biphosphate carboxylases may be nearly perfectly  
892 optimized. *Proc Natl Acad Sci USA* **103**, 7246–7251 (2006).
- 893 52. C. A. Kerfeld, C. Aussignargues, J. Zarzycki, F. Cai, M. Sutter, Bacterial  
894 microcompartments. *Nat. Rev. Microbiol.* **16**, 277–290 (2018).
- 895 53. G. D. Price, M. R. Badger, Isolation and Characterization of High CO<sub>2</sub>-Requiring-  
896 Mutants of the Cyanobacterium *Synechococcus* PCC7942 : Two Phenotypes that  
897 Accumulate Inorganic Carbon but Are Apparently Unable to Generate CO<sub>2</sub> within the  
898 Carboxysome. *Plant Physiol.* **91**, 514–525 (1989).
- 899 54. H. Wang, *et al.*, Rubisco condensate formation by CcmM in  $\beta$ -carboxysome biogenesis.  
900 *Nature* **566**, 131–135 (2019).
- 901 55. T. E. Jensen, Electron microscopy of polyphosphate bodies in a blue-green alga, *Nostoc*  
902 *pruniforme*. *Archiv. Mikrobiol.* **62**, 144–152 (1968).
- 903 56. S. A. Kranz, S. Dieter, K.-U. Richter, B. Rost, Carbon acquisition by *Trichodesmium*: the  
904 effect of pCO<sub>2</sub> and diurnal changes. *Limnol. Oceanogr.* **54**, 548–559 (2009).
- 905 57. M. Kędzior, *et al.*, Resurrected Rubisco suggests uniform carbon isotope signatures over  
906 geologic time. *Cell Rep.* **39**, 110726 (2022).
- 907 58. J. L. Collier, A. R. Grossman, Chlorosis induced by nutrient deprivation in *Synechococcus*  
908 sp. strain PCC 7942: not all bleaching is the same. *J. Bacteriol.* **174**, 4718–4726 (1992).

- 909 59. J. Erez, A. Bouevitch, A. Kaplan, Carbon isotope fractionation by photosynthetic aquatic  
910 microorganisms: experiments with *Synechococcus* PCC7942, and a simple carbon flux  
911 model. *Can. J. Bot.* **76**, 1109–1118 (1998).
- 912 60. J. J. Desmarais, *et al.*, DABs are inorganic carbon pumps found throughout prokaryotic  
913 phyla. *Nat. Microbiol.* **4**, 2204–2215 (2019).
- 914 61. T. Ogawa, A. Kaplan, Inorganic carbon acquisition systems in cyanobacteria. *Photosyn.*  
915 *Res.* **77**, 105–115 (2003).
- 916 62. M. Volokita, D. Zenvirth, A. Kaplan, L. Reinhold, Nature of the Inorganic Carbon Species  
917 Actively Taken Up by the Cyanobacterium *Anabaena variabilis*. *Plant Physiol.* **76**, 599–  
918 602 (1984).
- 919 63. G. D. Price, S. Maeda, T. Omata, M. R. Badger, Modes of active inorganic carbon uptake  
920 in the cyanobacterium, *Synechococcus* sp. PCC7942. *Functional Plant Biol.* **29**, 131  
921 (2002).
- 922 64. S. Maeda, M. R. Badger, G. D. Price, Novel gene products associated with NdhD3/D4-  
923 containing NDH-1 complexes are involved in photosynthetic CO<sub>2</sub> hydration in the  
924 cyanobacterium, *Synechococcus* sp. PCC7942. *Mol. Microbiol.* **43**, 425–435 (2002).
- 925 65. B. Klughammer, D. Sültemeyer, M. R. Badger, G. D. Price, The involvement of NAD(P)H  
926 dehydrogenase subunits, NdhD3 and NdhF3, in high-affinity CO<sub>2</sub> uptake in  
927 *Synechococcus* sp. PCC7002 gives evidence for multiple NDH-1 complexes with specific  
928 roles in cyanobacteria. *Mol. Microbiol.* **32**, 1305–1315 (1999).
- 929 66. J. M. Schuller, *et al.*, Redox-coupled proton pumping drives carbon concentration in the  
930 photosynthetic complex I. *Nat. Commun.* **11**, 494 (2020).
- 931 67. Z. Sade, I. Halevy, New constraints on kinetic isotope effects during CO<sub>2</sub>(aq) hydration  
932 and hydroxylation: Revisiting theoretical and experimental data. *Geochim. Cosmochim.*  
933 *Acta* **214**, 246–265 (2017).
- 934 68. R. E. Zeebe, D. Wolf-Gladrow, *CO<sub>2</sub> in seawater: Equilibrium, kinetics, isotopes* (Elsevier,  
935 2001).
- 936 69. I. D. Clark, B. Lauriol, Kinetic enrichment of stable isotopes in cryogenic calcites. *Chem.*  
937 *Geol.* **102**, 217–228 (1992).
- 938 70. W. Guo, “CARBONATE CLUMPED ISOTOPE THERMOMETRY: APPLICATION TO  
939 CARBONATE CHONDRITES & EFFECTS OF KINETIC ISOTOPE  
940 FRACTIONATION,” California Institute of Technology. (2009).
- 941 71. R. E. Zeebe, Kinetic fractionation of carbon and oxygen isotopes during hydration of  
942 carbon dioxide. *Geochim. Cosmochim. Acta* **139**, 540–552 (2014).
- 943 72. J. D. Boettger, J. D. Kubicki, Equilibrium and kinetic isotopic fractionation in the CO<sub>2</sub>  
944 hydration and hydroxylation reactions: Analysis of the role of hydrogen-bonding via  
945 quantum mechanical calculations. *Geochim. Cosmochim. Acta* **292**, 37–63 (2021).
- 946 73. D. Tchernov, *et al.*, Passive entry of CO<sub>2</sub> and its energy-dependent intracellular  
947 conversion to HCO<sub>3</sub><sup>-</sup> in cyanobacteria are driven by a photosystem I-generated

- 948           deltamuH+. *J. Biol. Chem.* **276**, 23450–23455 (2001).
- 949   74.   G. S. Espie, A. G. Miller, D. T. Canvin, High affinity transport of CO<sub>2</sub> in the  
950           cyanobacterium *Synechococcus* UTEX 625. *Plant Physiol.* **97**, 943–953 (1991).
- 951   75.   A. Kaplan, L. Reinhold, CO<sub>2</sub> concentrating mechanisms in photosynthetic  
952           microorganisms. *Annu. Rev. Plant Physiol. Plant Mol. Biol.* **50**, 539–570 (1999).
- 953   76.   J. Erez, A. Bouevitch, A. Kaplan, Carbon isotope fractionation by photosynthetic aquatic  
954           microorganisms: experiments with *Synechococcus* PCC7942, and a simple carbon flux  
955           model. *Can. J. Bot.* **76**, 1109–1118 (1998).
- 956   77.   N. Adir, M. Dines, M. Klartag, A. McGregor, M. Melamed-Frank, “Assembly and  
957           disassembly of phycobilisomes” in *Complex Intracellular Structures in Prokaryotes*,  
958           Microbiology Monographs., J. M. Shively, Ed. (Springer Berlin Heidelberg, 2006), pp. 47–  
959           77.
- 960   78.   N. Battchikova, M. Eisenhut, E.-M. Aro, Cyanobacterial NDH-1 complexes: novel insights  
961           and remaining puzzles. *Biochim. Biophys. Acta* **1807**, 935–944 (2011).
- 962   79.   C. Iñiguez, *et al.*, Evolutionary trends in RuBisCO kinetics and their co-evolution with CO<sub>2</sub>  
963           concentrating mechanisms. *Plant J.* **101**, 897–918 (2020).
- 964   80.   C. Fei, A. T. Wilson, N. M. Mangan, N. S. Wingreen, M. C. Jonikas, Modelling the  
965           pyrenoid-based CO<sub>2</sub>-concentrating mechanism provides insights into its operating  
966           principles and a roadmap for its engineering into crops. *Nat. Plants* **8**, 583–595 (2022).
- 967   81.   M. A. O’Malley, D. A. Walsh, Rethinking microbial infallibility in the metagenomics era.  
968           *FEMS Microbiol. Ecol.* **97** (2021).
- 969   82.   A. I. Flamholz, *et al.*, Trajectories for the evolution of bacterial CO<sub>2</sub>-concentrating  
970           mechanisms. *Proc Natl Acad Sci USA* **119**, e2210539119 (2022).
- 971   83.   S. S. Golden, L. A. Sherman, Optimal conditions for genetic transformation of the  
972           cyanobacterium *Anacystis nidulans* R2. *J. Bacteriol.* **158**, 36–42 (1984).
- 973   84.   S. Saschenbrecker, *et al.*, Structure and function of RbcX, an assembly chaperone for  
974           hexadecameric Rubisco. *Cell* **129**, 1189–1200 (2007).
- 975   85.   D. M. Banda, *et al.*, Novel bacterial clade reveals origin of form I Rubisco. *Nat. Plants* **6**,  
976           1158–1166 (2020).
